# Supplementary material for: Entomopathogenic Nematodes Combined with Adjuvants Presents a New Potential Biological Control Method for Managing the Wheat Stem Sawfly, Cephus cinctus (Hymenoptera: Cephidae)
Source: PLoS One. 2016 Dec 22;11(12):e0169022. doi: 10.1371/journal.pone.0169022 (PMC5179260; doi:10.1371/journal.pone.0169022)
Supplement: S1 Data — (XLSX) [file pone.0169022.s001.xlsx]

## Sheet: EPN infection Assay
H.indica	mean	mean	mean	S. kraussei	mean	mean	mean	S. felitae	mean	mean	mean
Dose	Day 1	Day 2	Day 3	Dose	Day 1	Day 2	Day 3	Dose	Day 1	Day 2	Day 3
50IJs/larva	0	100	100	50IJs/larva	0	20	40	50IJs/larva	0	20	60
100 Ijs/larva	0	100	100	100 Ijs/larva	0	40	60	100 Ijs/larva	0	40	60
200IJs/larva	0	100	100	200IJs/larva	0	40	80	200IJs/larva	0	80	100
500IJs/larva	0	100	100	500IJs/larva	0	40	60	500IJs/larva	0	80	100
Control	0	0	0	Control	0	0	0	Control	0	0	0
H.indica	S. Error	S. Error	S. Error	S. kraussei	S. Error	S. Error	S. Error	S. felitae	S. Error	S. Error	S. Error
Dose	Day 1	Day 2	Day 3	Dose	Day 1	Day 2	Day 3	Dose	Day 1	Day 2	Day 3
50IJs/larva	0	0	0	50IJs/larva	0	17.86	21.87	50IJs/larva	0	21.87	17.86
100 Ijs/larva	0	0	0	100 Ijs/larva	0	21.87	21.87	100 Ijs/larva	0	21.87	21.87
200IJs/larva	0	0	0	200IJs/larva	0	21.87	17.86	200IJs/larva	0	17.86	0
500IJs/larva	0	0	0	500IJs/larva	0	21.87	21.87	500IJs/larva	0	17.86	0
Control	0	0	0	Control	0	0	0	Control	0	0	0

## Sheet: Adjuvant Lab Assay
Repitition	Treatment Solution	EPN Species	Insect Stage	Insect Condition	Infected	Visible Worms
1	Adigor	HB	larva	dead	y	y
1	Adigor	HB	larva	dead	y	y
1	Adigor	HB	pupa	dead	y	y
1	Adigor	HB	pupa	dead	y	y
1	Adigor	HB	pupa	dead	y	y
1	Adigor	HB	pupa	dead	y	y
1	Adigor	HB	pupa	dead	y	y
1	Adigor	HB	larva	dead	n	n
1	Adigor	HB	larva	live	n	n
1	Adigor	HB	larva	live	n	n
1	Adigor	HB	pupa	live	n	n
1	Adigor	SF	larva	dead	y	y
1	Adigor	SF	larva	dead	y	y
1	Adigor	SF	larva	dead	y	y
1	Adigor	SF	larva	dead	y	y
1	Adigor	SF	larva	dead	y	y
1	Adigor	SF	pupa	dead	y	y
1	Adigor	SF	larva	dead	n	n
1	Adigor	SF	larva	live	n	n
1	Adigor	SF	larva	live	n	n
1	Adigor	SF	larva	live	n	n
1	Adigor	SF	larva	live	n	n
1	Adigor	SF	larva	live	n	n
1	Adigor	SF	pupa	dead	n	n
1	Adigor	SR	larva	dead	y	y
1	Adigor	SR	larva	dead	y	y
1	Adigor	SR	larva	dead	y	y
1	Adigor	SR	pupa	dead	y	y
1	Adigor	SR	larva	dead	n	n
1	Adigor	SR	larva	dead	n	n
1	Adigor	SR	pupa	live	n	n
2	Adigor	HB	larva	dead	y	y
2	Adigor	HB	pupa	dead	y	y
2	Adigor	HB	pupa	dead	y	y
2	Adigor	HB	larva	dead	n	n
2	Adigor	HB	larva	dead	n	n
2	Adigor	HB	larva	live	n	n
2	Adigor	HB	larva	live	n	n
2	Adigor	HB	larva	live	n	n
2	Adigor	HB	pupa	live	n	n
2	Adigor	HB	pupa	live	n	n
2	Adigor	HB	pupa	live	n	n
2	Adigor	HB	pupa	live	n	n
2	Adigor	SF	larva	dead	y	y
2	Adigor	SF	larva	dead	y	y
2	Adigor	SF	pupa	dead	y	y
2	Adigor	SF	larva	dead	n	n
2	Adigor	SF	larva	live	n	n
2	Adigor	SF	larva	live	n	n
2	Adigor	SF	larva	live	n	n
2	Adigor	SF	larva	live	n	n
2	Adigor	SF	larva	live	n	n
2	Adigor	SF	larva	live	n	n
2	Adigor	SF	pupa	live	n	n
2	Adigor	SF	pupa	live	n	n
2	Adigor	SR	pupa	dead	y	y
2	Adigor	SR	pupa	dead	y	y
2	Adigor	SR	uk	dead	y	y
2	Adigor	SR	larva	dead	n	n
2	Adigor	SR	larva	live	n	n
2	Adigor	SR	larva	live	n	n
2	Adigor	SR	larva	dead	n	n
2	Adigor	SR	larva	dead	n	n
2	Adigor	SR	larva	dead	n	n
2	Adigor	SR	pupa	live	n	n
2	Adigor	SR	pupa	live	n	n
2	Adigor	SR	uk	live	n	n
3	Adigor	HB	larva	dead	y	y
3	Adigor	HB	larva	dead	y	y
3	Adigor	HB	pupa	dead	y	y
3	Adigor	HB	larva	dead	n	n
3	Adigor	HB	larva	live	n	n
3	Adigor	HB	larva	live	n	n
3	Adigor	HB	larva	live	n	n
3	Adigor	HB	larva	live	n	n
3	Adigor	HB	pupa	live	n	n
3	Adigor	SF	larva	dead	y	y
3	Adigor	SF	larva	live	n	n
3	Adigor	SF	larva	live	n	n
3	Adigor	SF	larva	live	n	n
3	Adigor	SF	larva	live	n	n
3	Adigor	SF	larva	live	n	n
3	Adigor	SF	larva	live	n	n
3	Adigor	SF	pupa	dead	n	n
3	Adigor	SF	pupa	live	n	n
3	Adigor	SF	pupa	live	n	n
3	Adigor	SR	larva	dead	y	y
3	Adigor	SR	larva	dead	y	y
3	Adigor	SR	larva	dead	y	y
3	Adigor	SR	larva	dead	n	n
3	Adigor	SR	larva	dead	n	n
3	Adigor	SR	larva	live	n	n
3	Adigor	SR	larva	live	n	n
3	Adigor	SR	pupa	live	n	n
3	Adigor	SR	pupa	live	n	n
3	Adigor	SR	pupa	live	n	n
1	Barricade	HB	larva	dead	y	y
1	Barricade	HB	larva	dead	y	y
1	Barricade	HB	larva	dead	y	y
1	Barricade	HB	larva	dead	y	y
1	Barricade	HB	larva	dead	y	y
1	Barricade	HB	pupa	dead	y	y
1	Barricade	HB	larva	live	n	n
1	Barricade	HB	pupa	dead	n	y
1	Barricade	HB	pupa	live	n	n
1	Barricade	HB	pupa	live	n	n
1	Barricade	HB	pupa	live	n	n
1	Barricade	HB	pupa	live	n	n
1	Barricade	SF	larva	dead	y	y
1	Barricade	SF	larva	dead	y	y
1	Barricade	SF	pupa	dead	y	y
1	Barricade	SF	pupa	dead	y	y
1	Barricade	SF	larva	live	n	n
1	Barricade	SF	larva	live	n	n
1	Barricade	SF	larva	live	n	n
1	Barricade	SF	pupa	live	n	n
1	Barricade	SF	pupa	live	n	n
1	Barricade	SF	pupa	live	n	n
1	Barricade	SR	larva	dead	y	y
1	Barricade	SR	larva	dead	y	y
1	Barricade	SR	pupa	dead	y	y
1	Barricade	SR	pupa	dead	y	y
1	Barricade	SR	pupa	dead	y	y
1	Barricade	SR	larva	live	n	n
1	Barricade	SR	larva	dead	n	n
1	Barricade	SR	pupa	live	n	n
1	Barricade	SR	pupa	live	n	n
1	Barricade	SR	uk	live	n	n
2	Barricade	HB	larva	dead	y	y
2	Barricade	HB	larva	dead	y	y
2	Barricade	HB	pupa	dead	y	y
2	Barricade	HB	pupa	dead	y	y
2	Barricade	HB	pupa	dead	y	y
2	Barricade	HB	larva	dead	n	n
2	Barricade	HB	larva	live	n	n
2	Barricade	HB	larva	live	n	n
2	Barricade	HB	larva	live	n	n
2	Barricade	HB	larva	live	n	n
2	Barricade	HB	pupa	live	n	n
2	Barricade	SF	larva	dead	y	y
2	Barricade	SF	larva	dead	y	y
2	Barricade	SF	larva	dead	y	y
2	Barricade	SF	larva	dead	n	n
2	Barricade	SF	larva	dead	n	n
2	Barricade	SF	larva	dead	n	n
2	Barricade	SF	larva	live	n	n
2	Barricade	SF	pupa	live	n	n
2	Barricade	SF	pupa	live	n	n
2	Barricade	SF	pupa	live	n	n
2	Barricade	SF	pupa	live	n	n
2	Barricade	SF	pupa	live	n	n
2	Barricade	SF	pupa	live	n	n
2	Barricade	SR	larva	dead	y	y
2	Barricade	SR	larva	dead	y	y
2	Barricade	SR	larva	dead	y	y
2	Barricade	SR	larva	dead	y	y
2	Barricade	SR	pupa	dead	y	y
2	Barricade	SR	pupa	dead	y	y
2	Barricade	SR	pupa	dead	y	y
2	Barricade	SR	larva	dead	n	n
2	Barricade	SR	larva	live	n	n
2	Barricade	SR	larva	live	n	n
2	Barricade	SR	larva	dead	n	n
3	Barricade	HB	larva	dead	y	y
3	Barricade	HB	larva	dead	y	y
3	Barricade	HB	larva	dead	y	y
3	Barricade	HB	larva	dead	y	y
3	Barricade	HB	larva	dead	y	y
3	Barricade	HB	larva	dead	y	y
3	Barricade	HB	pupa	dead	y	y
3	Barricade	HB	pupa	dead	y	y
3	Barricade	HB	pupa	dead	y	y
3	Barricade	HB	larva	live	n	n
3	Barricade	HB	larva	live	n	n
3	Barricade	HB	larva	uk	n	n
3	Barricade	SF	larva	dead	y	y
3	Barricade	SF	larva	dead	y	y
3	Barricade	SF	larva	live	n	n
3	Barricade	SF	larva	live	n	n
3	Barricade	SF	larva	live	n	n
3	Barricade	SF	larva	live	n	n
3	Barricade	SF	pupa	live	n	n
3	Barricade	SF	pupa	live	n	n
3	Barricade	SF	pupa	live	n	n
3	Barricade	SF	pupa	live	n	n
3	Barricade	SF	pupa	live	n	n
3	Barricade	SF	pupa	live	n	n
3	Barricade	SF	pupa	live	n	n
3	Barricade	SR	larva	dead	y	y
3	Barricade	SR	larva	dead	y	y
3	Barricade	SR	larva	dead	y	y
3	Barricade	SR	larva	dead	y	y
3	Barricade	SR	larva	dead	y	y
3	Barricade	SR	pupa	dead	y	y
3	Barricade	SR	pupa	dead	y	y
3	Barricade	SR	pupa	dead	y	y
3	Barricade	SR	uk	dead	y	y
3	Barricade	SR	larva	live	n	n
3	Barricade	SR	larva	live	n	n
1	H2O	HB	larva	dead	y	y
1	H2O	HB	pupa	dead	y	y
1	H2O	HB	pupa	dead	y	y
1	H2O	HB	pupa	dead	y	y
1	H2O	HB	larva	dead	n	n
1	H2O	HB	larva	dead	n	n
1	H2O	HB	larva	live	n	n
1	H2O	HB	larva	live	n	n
1	H2O	HB	pupa	live	n	n
1	H2O	SF	larva	dead	y	y
1	H2O	SF	larva	dead	y	y
1	H2O	SF	larva	dead	y	y
1	H2O	SF	pupa	dead	y	y
1	H2O	SF	larva	dead	n	n
1	H2O	SF	larva	dead	n	n
1	H2O	SF	larva	dead	n	n
1	H2O	SF	larva	dead	n	n
1	H2O	SF	larva	live	n	n
1	H2O	SF	larva	live	n	n
1	H2O	SF	larva	live	n	n
1	H2O	SR	larva	dead	y	y
1	H2O	SR	larva	dead	y	y
1	H2O	SR	larva	dead	y	y
1	H2O	SR	larva	dead	y	y
1	H2O	SR	larva	dead	y	y
1	H2O	SR	pupa	dead	y	y
1	H2O	SR	larva	dead	n	n
1	H2O	SR	larva	dead	n	n
1	H2O	SR	pupa	live	n	n
1	H2O	SR	pupa	live	n	n
1	H2O	SR	Pupa	live	n	n
2	H2O	HB	larva	dead	y	y
2	H2O	HB	larva	dead	y	y
2	H2O	HB	pupa	dead	y	y
2	H2O	HB	pupa	dead	y	y
2	H2O	HB	larva	dead	n	n
2	H2O	HB	larva	live	n	n
2	H2O	HB	larva	live	n	n
2	H2O	HB	larva	live	n	n
2	H2O	HB	larva	live	n	n
2	H2O	HB	larva	live	n	n
2	H2O	HB	pupa	live	n	n
2	H2O	SF	larva	dead	y	y
2	H2O	SF	larva	dead	y	y
2	H2O	SF	larva	dead	n	n
2	H2O	SF	larva	dead	n	n
2	H2O	SF	larva	dead	n	n
2	H2O	SF	larva	dead	n	n
2	H2O	SF	larva	live	n	n
2	H2O	SF	larva	live	n	n
2	H2O	SF	larva	live	n	n
2	H2O	SF	pupa	live	n	n
2	H2O	SF	pupa	live	n	n
2	H2O	SR	larva	dead	y	y
2	H2O	SR	larva	dead	y	y
2	H2O	SR	larva	dead	y	y
2	H2O	SR	pupa	dead	y	y
2	H2O	SR	pupa	dead	y	y
2	H2O	SR	pupa	dead	y	y
2	H2O	SR	larva	dead	n	n
2	H2O	SR	larva	dead	n	n
2	H2O	SR	pupa	dead	n	n
2	H2O	SR	pupa	dead	n	n
3	H2O	HB	larva	dead	y	y
3	H2O	HB	larva	dead	y	y
3	H2O	HB	larva	dead	y	y
3	H2O	HB	larva	dead	y	y
3	H2O	HB	larva	dead	y	y
3	H2O	HB	larva	dead	y	y
3	H2O	HB	pupa	dead	y	y
3	H2O	HB	larva	dead	n	n
3	H2O	HB	larva	live	n	n
3	H2O	HB	larva	live	n	n
3	H2O	HB	pupa	live	n	n
3	H2O	HB	pupa	live	n	n
3	H2O	SF	larva	dead	y	y
3	H2O	SF	larva	dead	n	n
3	H2O	SF	larva	dead	n	n
3	H2O	SF	larva	dead	n	n
3	H2O	SF	larva	dead	n	n
3	H2O	SF	larva	live	n	n
3	H2O	SF	larva	live	n	n
3	H2O	SF	pupa	live	n	n
3	H2O	SF	pupa	live	n	n
3	H2O	SR	larva	dead	y	y
3	H2O	SR	larva	dead	y	y
3	H2O	SR	larva	dead	y	y
3	H2O	SR	larva	dead	y	y
3	H2O	SR	pupa	dead	y	y
3	H2O	SR	pupa	dead	y	y
3	H2O	SR	larva	dead	n	n
3	H2O	SR	larva	live	n	n
3	H2O	SR	larva	live	n	n
3	H2O	SR	pupa	live	n	n
3	H2O	SR	pupa	live	n	n
1	CTL	None	larva	dead	n	n
1	CTL	None	larva	dead	n	n
1	CTL	None	prepupa	dead	n	n
1	CTL	None	prepupa	live	n	n
1	CTL	None	prepupa	live	n	n
2	CTL	None	prepupa	dead	n	n
2	CTL	None	pupa	live	n	n
2	CTL	None	pupa	live	n	n
2	CTL	None	pupa	live	n	n
3	CTL	None	larva	dead	n	n
3	CTL	None	prepupa	live	n	n
3	CTL	None	prepupa	live	n	n
3	CTL	None	prepupa	live	n	n
3	CTL	None	pupa	dead	n	n
1	Penterra	HB	pupa	dead	y	y
1	Penterra	HB	pupa	dead	y	y
1	Penterra	HB	larva	dead	n	n
1	Penterra	HB	larva	live	n	n
1	Penterra	HB	pupa	live	n	n
1	Penterra	HB	pupa	live	n	n
1	Penterra	HB	pupa	live	n	n
1	Penterra	HB	pupa	live	n	n
1	Penterra	HB	pupa	live	n	n
1	Penterra	SF	larva	dead	y	y
1	Penterra	SF	larva	dead	y	y
1	Penterra	SF	larva	dead	y	y
1	Penterra	SF	larva	dead	y	y
1	Penterra	SF	pupa	dead	y	y
1	Penterra	SF	pupa	dead	y	y
1	Penterra	SF	larva	live	n	n
1	Penterra	SF	larva	live	n	n
1	Penterra	SF	pupa	dead	n	n
1	Penterra	SF	pupa	live	n	n
1	Penterra	SF	pupa	live	n	n
1	Penterra	SR	larva	dead	y	y
1	Penterra	SR	larva	dead	y	y
1	Penterra	SR	larva	dead	y	y
1	Penterra	SR	pupa	dead	y	y
1	Penterra	SR	pupa	dead	y	y
1	Penterra	SR	larva	dead	n	n
1	Penterra	SR	pupa	live	n	n
2	Penterra	HB	larva	dead	y	y
2	Penterra	HB	larva	dead	y	y
2	Penterra	HB	larva	dead	y	y
2	Penterra	HB	pupa	dead	y	y
2	Penterra	HB	pupa	dead	y	y
2	Penterra	HB	larva	dead	n	n
2	Penterra	HB	larva	live	n	n
2	Penterra	HB	larva	live	n	n
2	Penterra	HB	pupa	live	n	n
2	Penterra	HB	pupa	live	n	n
2	Penterra	SF	larva	dead	y	y
2	Penterra	SF	pupa	dead	y	y
2	Penterra	SF	larva	dead	n	n
2	Penterra	SF	larva	dead	n	n
2	Penterra	SF	larva	dead	n	n
2	Penterra	SF	larva	dead	n	n
2	Penterra	SF	larva	dead	n	n
2	Penterra	SF	larva	dead	n	n
2	Penterra	SF	larva	dead	n	n
2	Penterra	SF	larva	dead	n	n
2	Penterra	SF	larva	dead	n	n
2	Penterra	SF	larva	live	n	n
2	Penterra	SF	pupa	dead	n	n
2	Penterra	SR	larva	dead	y	y
2	Penterra	SR	larva	dead	y	y
2	Penterra	SR	larva	dead	y	y
2	Penterra	SR	larva	dead	y	y
2	Penterra	SR	larva	dead	y	y
2	Penterra	SR	larva	dead	y	y
2	Penterra	SR	pupa	dead	y	y
2	Penterra	SR	pupa	dead	y	y
2	Penterra	SR	uk	dead	y	y
2	Penterra	SR	larva	dead	n	n
2	Penterra	SR	larva	dead	n	n
2	Penterra	SR	larva	live	n	n
2	Penterra	SR	larva	live	n	n
3	Penterra	HB	larva	dead	y	y
3	Penterra	HB	larva	dead	y	y
3	Penterra	HB	larva	dead	y	y
3	Penterra	HB	larva	dead	y	y
3	Penterra	HB	larva	dead	y	y
3	Penterra	HB	pupa	dead	y	y
3	Penterra	HB	larva	dead	n	n
3	Penterra	HB	larva	dead	n	n
3	Penterra	HB	larva	live	n	n
3	Penterra	HB	larva	live	n	n
3	Penterra	HB	pupa	live	n	n
3	Penterra	SF	larva	dead	y	y
3	Penterra	SF	larva	dead	y	y
3	Penterra	SF	larva	dead	y	y
3	Penterra	SF	pupa	dead	y	y
3	Penterra	SF	pupa	dead	y	y
3	Penterra	SF	pupa	dead	y	y
3	Penterra	SF	larva	dead	n	n
3	Penterra	SF	larva	dead	n	n
3	Penterra	SF	larva	dead	n	n
3	Penterra	SF	larva	live	n	n
3	Penterra	SF	larva	live	n	n
3	Penterra	SR	larva	dead	y	y
3	Penterra	SR	larva	dead	y	y
3	Penterra	SR	larva	dead	y	y
3	Penterra	SR	larva	dead	y	y
3	Penterra	SR	larva	dead	y	y
3	Penterra	SR	larva	dead	y	y
3	Penterra	SR	pupa	dead	y	y
3	Penterra	SR	pupa	dead	y	y
3	Penterra	SR	larva	live	n	n
3	Penterra	SR	larva	live	n	n
3	Penterra	SR	pupa	live	n	n
1	R-11	HB	larva	dead	y	y
1	R-11	HB	larva	dead	y	y
1	R-11	HB	larva	dead	y	y
1	R-11	HB	pupa	dead	y	y
1	R-11	HB	larva	dead	n	n
1	R-11	HB	larva	dead	n	n
1	R-11	HB	larva	dead	n	n
1	R-11	HB	larva	live	n	n
1	R-11	HB	larva	live	n	n
1	R-11	HB	pupa	live	n	n
1	R-11	HB	pupa	live	n	n
1	R-11	SF	larva	dead	y	y
1	R-11	SF	larva	dead	y	y
1	R-11	SF	larva	dead	y	y
1	R-11	SF	larva	dead	y	y
1	R-11	SF	larva	dead	y	y
1	R-11	SF	larva	dead	y	y
1	R-11	SF	pupa	dead	y	y
1	R-11	SF	pupa	dead	y	y
1	R-11	SF	larva	dead	n	n
1	R-11	SF	larva	dead	n	n
1	R-11	SF	larva	dead	n	n
1	R-11	SF	larva	dead	n	n
1	R-11	SF	larva	dead	n	n
1	R-11	SR	larva	dead	y	y
1	R-11	SR	larva	dead	y	y
1	R-11	SR	larva	dead	y	y
1	R-11	SR	pupa	dead	y	y
1	R-11	SR	larva	dead	n	n
1	R-11	SR	larva	live	n	n
1	R-11	SR	larva	live	n	n
1	R-11	SR	pupa	live	n	n
1	R-11	SR	pupa	live	n	n
1	R-11	SR	pupa	live	n	n
2	R-11	HB	larva	dead	y	y
2	R-11	HB	pupa	dead	y	y
2	R-11	HB	pupa	dead	y	y
2	R-11	HB	pupa	dead	y	y
2	R-11	HB	pupa	dead	y	y
2	R-11	HB	larva	live	n	n
2	R-11	HB	larva	live	n	n
2	R-11	HB	larva	live	n	n
2	R-11	HB	larva	live	n	n
2	R-11	HB	pupa	live	n	n
2	R-11	HB	pupa	live	n	n
2	R-11	HB	pupa	live	n	n
2	R-11	SF	larva	dead	y	y
2	R-11	SF	larva	dead	y	y
2	R-11	SF	pupa	dead	y	y
2	R-11	SF	larva	dead	n	n
2	R-11	SF	larva	dead	n	n
2	R-11	SF	larva	live	n	n
2	R-11	SF	larva	live	n	n
2	R-11	SF	larva	live	n	n
2	R-11	SF	pupa	live	n	n
2	R-11	SF	pupa	live	n	n
2	R-11	SR	larva	dead	y	y
2	R-11	SR	larva	dead	y	y
2	R-11	SR	larva	dead	y	y
2	R-11	SR	pupa	dead	y	y
2	R-11	SR	pupa	dead	y	y
2	R-11	SR	larva	dead	n	n
2	R-11	SR	larva	dead	n	n
2	R-11	SR	larva	live	n	n
2	R-11	SR	larva	live	n	n
2	R-11	SR	larva	live	n	n
2	R-11	SR	pupa	live	n	n
3	R-11	HB	larva	dead	y	y
3	R-11	HB	larva	dead	y	y
3	R-11	HB	larva	dead	y	y
3	R-11	HB	pupa	dead	y	y
3	R-11	HB	larva	live	n	n
3	R-11	HB	larva	live	n	n
3	R-11	HB	larva	live	n	n
3	R-11	HB	larva	live	n	n
3	R-11	HB	pupa	dead	n	n
3	R-11	HB	pupa	live	n	n
3	R-11	HB	pupa	live	n	n
3	R-11	SF	larva	dead	y	y
3	R-11	SF	larva	dead	y	y
3	R-11	SF	pupa	dead	y	y
3	R-11	SF	larva	dead	n	n
3	R-11	SF	larva	dead	n	n
3	R-11	SF	larva	dead	n	n
3	R-11	SF	larva	dead	n	n
3	R-11	SF	larva	live	n	n
3	R-11	SF	larva	live	n	n
3	R-11	SF	larva	live	n	n
3	R-11	SF	pupa	live	n	n
3	R-11	SF	pupa	live	n	n
3	R-11	SF	pupa	live	n	n
3	R-11	SR	larva	dead	y	y
3	R-11	SR	larva	dead	y	y
3	R-11	SR	larva	dead	y	y
3	R-11	SR	larva	dead	y	y
3	R-11	SR	larva	dead	y	y
3	R-11	SR	larva	dead	y	y
3	R-11	SR	pupa	dead	y	y
3	R-11	SR	larva	live	n	n
3	R-11	SR	larva	live	n	n
3	R-11	SR	larva	live	n	n
3	R-11	SR	larva	live	n	n
3	R-11	SR	larva	live	n	n
1	Silwet	HB	larva	dead	y	y
1	Silwet	HB	larva	dead	y	y
1	Silwet	HB	larva	dead	y	y
1	Silwet	HB	larva	dead	y	y
1	Silwet	HB	pupa	dead	y	y
1	Silwet	HB	pupa	dead	y	y
1	Silwet	HB	pupa	dead	y	y
1	Silwet	HB	pupa	dead	y	y
1	Silwet	HB	pupa	dead	y	y
1	Silwet	HB	larva	live	n	n
1	Silwet	SF	larva	dead	y	y
1	Silwet	SF	larva	dead	y	y
1	Silwet	SF	larva	dead	y	y
1	Silwet	SF	larva	dead	y	y
1	Silwet	SF	pupa	dead	y	y
1	Silwet	SF	pupa	dead	y	y
1	Silwet	SF	pupa	dead	y	y
1	Silwet	SF	larva	live	n	n
1	Silwet	SF	pupa	live	n	n
1	Silwet	SR	larva	dead	y	y
1	Silwet	SR	larva	dead	y	y
1	Silwet	SR	pupa	dead	y	y
1	Silwet	SR	pupa	dead	y	y
1	Silwet	SR	larva	dead	n	n
1	Silwet	SR	larva	live	n	n
1	Silwet	SR	larva	dead	n	n
1	Silwet	SR	pupa	live	n	n
1	Silwet	SR	pupa	live	n	n
1	Silwet	SR	pupa	live	n	n
1	Silwet	SR	pupa	live	n	n
2	Silwet	HB	larva	dead	y	y
2	Silwet	HB	larva	dead	y	y
2	Silwet	HB	larva	dead	y	y
2	Silwet	HB	larva	dead	y	y
2	Silwet	HB	pupa	dead	y	y
2	Silwet	HB	pupa	dead	y	y
2	Silwet	HB	larva	live	n	n
2	Silwet	HB	larva	live	n	n
2	Silwet	HB	larva	live	n	n
2	Silwet	HB	larva	live	n	n
2	Silwet	HB	larva	live	n	n
2	Silwet	HB	pupa	live	n	n
2	Silwet	HB	pupa	live	n	n
2	Silwet	SF	larva	dead	y	y
2	Silwet	SF	larva	dead	n	n
2	Silwet	SF	larva	dead	n	n
2	Silwet	SF	larva	dead	n	n
2	Silwet	SF	larva	dead	n	n
2	Silwet	SF	larva	live	n	n
2	Silwet	SF	larva	live	n	n
2	Silwet	SF	larva	live	n	n
2	Silwet	SF	larva	live	n	n
2	Silwet	SF	pupa	live	n	n
2	Silwet	SR	larva	dead	y	y
2	Silwet	SR	larva	dead	y	y
2	Silwet	SR	larva	dead	y	y
2	Silwet	SR	larva	dead	y	y
2	Silwet	SR	larva	dead	n	n
2	Silwet	SR	larva	live	n	n
2	Silwet	SR	larva	live	n	n
2	Silwet	SR	larva	live	n	n
2	Silwet	SR	larva	live	n	n
2	Silwet	SR	pupa	live	n	n
2	Silwet	SR	pupa	live	n	n
3	Silwet	HB	larva	dead	y	y
3	Silwet	HB	larva	dead	y	y
3	Silwet	HB	larva	dead	y	y
3	Silwet	HB	larva	dead	y	y
3	Silwet	HB	larva	dead	y	y
3	Silwet	HB	larva	live	n	n
3	Silwet	HB	larva	live	n	n
3	Silwet	HB	larva	live	n	n
3	Silwet	HB	pupa	live	n	n
3	Silwet	HB	pupa	live	n	n
3	Silwet	SF	larva	dead	y	y
3	Silwet	SF	larva	dead	y	y
3	Silwet	SF	larva	dead	y	y
3	Silwet	SF	larva	dead	y	y
3	Silwet	SF	larva	dead	y	y
3	Silwet	SF	larva	live	n	n
3	Silwet	SF	larva	live	n	n
3	Silwet	SF	larva	live	n	n
3	Silwet	SF	larva	live	n	n
3	Silwet	SF	larva	live	n	n
3	Silwet	SF	pupa	live	n	n
3	Silwet	SR	larva	dead	y	y
3	Silwet	SR	larva	dead	y	y
3	Silwet	SR	larva	dead	y	y
3	Silwet	SR	larva	dead	y	y
3	Silwet	SR	larva	dead	y	y
3	Silwet	SR	pupa	dead	y	y
3	Silwet	SR	pupa	dead	y	y
3	Silwet	SR	larva	dead	n	n
3	Silwet	SR	larva	live	n	n
3	Silwet	SR	larva	live	n	n
3	Silwet	SR	pupa	live	n	n
3	Silwet	SR	pupa	live	n	n
1	Sun Ag Oil	HB	pupa	dead	y	y
1	Sun Ag Oil	HB	pupa	dead	y	y
1	Sun Ag Oil	HB	pupa	dead	y	y
1	Sun Ag Oil	HB	pupa	dead	y	y
1	Sun Ag Oil	HB	pupa	dead	y	y
1	Sun Ag Oil	HB	larva	dead	n	n
1	Sun Ag Oil	HB	pupa	live	n	n
1	Sun Ag Oil	HB	pupa	live	n	n
1	Sun Ag Oil	HB	pupa	live	n	n
1	Sun Ag Oil	HB	pupa	live	n	n
1	Sun Ag Oil	HB	pupa	live	n	n
1	Sun Ag Oil	SF	larva	dead	y	y
1	Sun Ag Oil	SF	larva	dead	y	y
1	Sun Ag Oil	SF	larva	dead	y	y
1	Sun Ag Oil	SF	larva	dead	y	y
1	Sun Ag Oil	SF	larva	dead	y	y
1	Sun Ag Oil	SF	pupa	dead	y	y
1	Sun Ag Oil	SF	pupa	dead	y	y
1	Sun Ag Oil	SF	pupa	dead	y	y
1	Sun Ag Oil	SF	larva	live	n	n
1	Sun Ag Oil	SR	larva	dead	y	y
1	Sun Ag Oil	SR	larva	dead	y	y
1	Sun Ag Oil	SR	larva	dead	y	y
1	Sun Ag Oil	SR	larva	dead	y	y
1	Sun Ag Oil	SR	larva	dead	y	y
1	Sun Ag Oil	SR	larva	dead	y	y
1	Sun Ag Oil	SR	larva	dead	n	n
1	Sun Ag Oil	SR	larva	dead	n	n
1	Sun Ag Oil	SR	larva	live	n	n
2	Sun Ag Oil	HB	larva	dead	y	y
2	Sun Ag Oil	HB	larva	dead	y	y
2	Sun Ag Oil	HB	larva	dead	y	y
2	Sun Ag Oil	HB	larva	dead	n	n
2	Sun Ag Oil	HB	larva	live	n	n
2	Sun Ag Oil	HB	larva	live	n	n
2	Sun Ag Oil	HB	larva	live	n	n
2	Sun Ag Oil	HB	larva	live	n	n
2	Sun Ag Oil	HB	larva	live	n	n
2	Sun Ag Oil	HB	pupa	live	n	n
2	Sun Ag Oil	SF	larva	dead	y	y
2	Sun Ag Oil	SF	larva	dead	y	y
2	Sun Ag Oil	SF	larva	dead	y	y
2	Sun Ag Oil	SF	larva	dead	n	n
2	Sun Ag Oil	SF	larva	dead	n	n
2	Sun Ag Oil	SF	larva	dead	n	n
2	Sun Ag Oil	SF	larva	live	n	n
2	Sun Ag Oil	SF	larva	live	n	n
2	Sun Ag Oil	SF	larva	live	n	n
2	Sun Ag Oil	SF	larva	live	n	n
2	Sun Ag Oil	SF	larva	live	n	n
2	Sun Ag Oil	SF	pupa	live	n	n
2	Sun Ag Oil	SR	larva	dead	y	y
2	Sun Ag Oil	SR	pupa	dead	y	y
2	Sun Ag Oil	SR	larva	dead	n	n
2	Sun Ag Oil	SR	larva	dead	n	n
2	Sun Ag Oil	SR	larva	dead	n	n
2	Sun Ag Oil	SR	larva	live	n	n
2	Sun Ag Oil	SR	larva	live	n	n
2	Sun Ag Oil	SR	larva	live	n	n
2	Sun Ag Oil	SR	larva	live	n	n
2	Sun Ag Oil	SR	larva	live	n	n
2	Sun Ag Oil	SR	larva	live	n	n
3	Sun Ag Oil	HB	larva	dead	y	y
3	Sun Ag Oil	HB	pupa	dead	y	y
3	Sun Ag Oil	HB	pupa	dead	y	y
3	Sun Ag Oil	HB	larva	live	n	n
3	Sun Ag Oil	HB	larva	live	n	n
3	Sun Ag Oil	HB	pupa	live	n	n
3	Sun Ag Oil	HB	pupa	live	n	n
3	Sun Ag Oil	HB	pupa	live	n	n
3	Sun Ag Oil	HB	pupa	live	n	n
3	Sun Ag Oil	HB	pupa	live	n	n
3	Sun Ag Oil	HB	pupa	live	n	n
3	Sun Ag Oil	SF	larva	dead	y	y
3	Sun Ag Oil	SF	pupa	dead	y	y
3	Sun Ag Oil	SF	pupa	dead	y	y
3	Sun Ag Oil	SF	pupa	dead	y	y
3	Sun Ag Oil	SF	pupa	dead	y	y
3	Sun Ag Oil	SF	larva	dead	n	n
3	Sun Ag Oil	SF	larva	live	n	n
3	Sun Ag Oil	SF	larva	live	n	n
3	Sun Ag Oil	SF	larva	live	n	n
3	Sun Ag Oil	SF	larva	live	n	n
3	Sun Ag Oil	SF	larva	live	n	n
3	Sun Ag Oil	SF	pupa	live	n	n
3	Sun Ag Oil	SR	larva	dead	y	y
3	Sun Ag Oil	SR	larva	dead	y	y
3	Sun Ag Oil	SR	pupa	dead	y	y
3	Sun Ag Oil	SR	pupa	dead	y	y
3	Sun Ag Oil	SR	larva	dead	n	n
3	Sun Ag Oil	SR	larva	live	n	n
3	Sun Ag Oil	SR	larva	live	n	n
3	Sun Ag Oil	SR	larva	live	n	n
3	Sun Ag Oil	SR	larva	live	n	n
3	Sun Ag Oil	SR	pupa	live	n	n
3	Sun Ag Oil	SR	pupa	live	n	n
1	SunSpray Oil	HB	pupa	dead	y	y
1	SunSpray Oil	HB	pupa	dead	y	y
1	SunSpray Oil	HB	pupa	dead	y	y
1	SunSpray Oil	HB	larva	dead	n	n
1	SunSpray Oil	HB	larva	dead	n	n
1	SunSpray Oil	HB	pupa	dead	n	n
1	SunSpray Oil	HB	pupa	live	n	n
1	Sunspray Oil	SF	larva	dead	y	y
1	Sunspray Oil	SF	larva	dead	y	y
1	Sunspray Oil	SF	larva	dead	y	y
1	Sunspray Oil	SF	larva	dead	y	y
1	Sunspray Oil	SF	larva	dead	y	y
1	Sunspray Oil	SF	larva	dead	y	y
1	Sunspray Oil	SF	pupa	dead	y	y
1	Sunspray Oil	SF	pupa	dead	y	y
1	Sunspray Oil	SF	larva	dead	n	n
1	Sunspray Oil	SF	larva	dead	n	n
1	Sunspray Oil	SF	larva	live	n	n
1	Sunspray Oil	SR	larva	dead	y	y
1	Sunspray Oil	SR	larva	dead	y	y
1	Sunspray Oil	SR	larva	dead	y	y
1	Sunspray Oil	SR	larva	dead	y	y
1	Sunspray Oil	SR	pupa	dead	y	y
1	Sunspray Oil	SR	larva	dead	n	n
1	Sunspray Oil	SR	larva	live	n	n
1	Sunspray Oil	SR	larva	live	n	n
1	Sunspray Oil	SR	pupa	live	n	n
1	Sunspray Oil	SR	pupa	live	n	n
1	Sunspray Oil	SR	pupa	live	n	n
1	Sunspray Oil	SR	pupa	live	n	n
2	SunSpray Oil	HB	larva	dead	y	y
2	SunSpray Oil	HB	larva	dead	y	y
2	SunSpray Oil	HB	larva	dead	y	y
2	SunSpray Oil	HB	larva	dead	y	y
2	SunSpray Oil	HB	larva	dead	y	y
2	SunSpray Oil	HB	larva	dead	y	y
2	SunSpray Oil	HB	pupa	dead	y	y
2	SunSpray Oil	HB	pupa	dead	y	y
2	SunSpray Oil	HB	larva	live	n	n
2	SunSpray Oil	HB	uk	live	n	n
2	Sunspray Oil	SF	larva	dead	y	y
2	Sunspray Oil	SF	larva	dead	y	y
2	Sunspray Oil	SF	larva	dead	y	y
2	Sunspray Oil	SF	larva	dead	y	y
2	Sunspray Oil	SF	larva	dead	y	y
2	Sunspray Oil	SF	pupa	dead	y	y
2	Sunspray Oil	SF	larva	dead	n	n
2	Sunspray Oil	SF	larva	dead	n	n
2	Sunspray Oil	SF	larva	dead	n	n
2	Sunspray Oil	SF	larva	dead	n	n
2	Sunspray Oil	SF	larva	live	n	n
2	Sunspray Oil	SF	pupa	live	n	n
2	Sunspray Oil	SF	pupa	live	n	n
2	Sunspray Oil	SR	larva	dead	y	y
2	Sunspray Oil	SR	larva	dead	y	y
2	Sunspray Oil	SR	larva	dead	y	y
2	Sunspray Oil	SR	larva	dead	y	y
2	Sunspray Oil	SR	pupa	dead	y	y
2	Sunspray Oil	SR	pupa	dead	y	y
2	Sunspray Oil	SR	uk	dead	y	y
2	Sunspray Oil	SR	uk	dead	y	y
2	Sunspray Oil	SR	larva	dead	n	n
2	Sunspray Oil	SR	larva	live	n	n
2	Sunspray Oil	SR	larva	dead	n	n
3	SunSpray Oil	HB	larva	dead	y	y
3	SunSpray Oil	HB	larva	dead	y	y
3	SunSpray Oil	HB	larva	dead	y	y
3	SunSpray Oil	HB	pupa	dead	y	y
3	SunSpray Oil	HB	pupa	dead	y	y
3	SunSpray Oil	HB	pupa	dead	y	y
3	SunSpray Oil	HB	pupa	dead	y	y
3	SunSpray Oil	HB	larva	live	n	n
3	SunSpray Oil	HB	larva	live	n	n
3	SunSpray Oil	HB	pupa	live	n	n
3	SunSpray Oil	HB	pupa	live	n	n
3	Sunspray Oil	SF	larva	dead	y	y
3	Sunspray Oil	SF	larva	dead	y	y
3	Sunspray Oil	SF	pupa	dead	y	y
3	Sunspray Oil	SF	larva	dead	n	n
3	Sunspray Oil	SF	larva	dead	n	n
3	Sunspray Oil	SF	larva	live	n	n
3	Sunspray Oil	SF	larva	live	n	n
3	Sunspray Oil	SF	larva	live	n	n
3	Sunspray Oil	SF	larva	live	n	n
3	Sunspray Oil	SR	larva	dead	y	y
3	Sunspray Oil	SR	larva	dead	y	y
3	Sunspray Oil	SR	larva	dead	y	y
3	Sunspray Oil	SR	larva	dead	y	y
3	Sunspray Oil	SR	larva	dead	y	y
3	Sunspray Oil	SR	larva	dead	y	y
3	Sunspray Oil	SR	larva	dead	y	y
3	Sunspray Oil	SR	pupa	dead	y	y
3	Sunspray Oil	SR	larva	live	n	n
3	Sunspray Oil	SR	larva	live	n	n
3	Sunspray Oil	SR	pupa	dead	n	n
1	Syl-Tac	HB	larva	dead	y	y
1	Syl-Tac	HB	larva	dead	y	y
1	Syl-Tac	HB	larva	dead	y	y
1	Syl-Tac	HB	pupa	dead	y	y
1	Syl-Tac	HB	pupa	dead	y	y
1	Syl-Tac	HB	pupa	dead	y	y
1	Syl-Tac	HB	pupa	dead	y	y
1	Syl-Tac	HB	larva	dead	n	n
1	Syl-Tac	HB	larva	live	n	n
1	Syl-Tac	HB	larva	live	n	n
1	Syl-Tac	SF	larva	dead	y	y
1	Syl-Tac	SF	larva	dead	y	y
1	Syl-Tac	SF	larva	dead	y	y
1	Syl-Tac	SF	pupa	dead	y	y
1	Syl-Tac	SF	larva	dead	n	n
1	Syl-Tac	SF	larva	dead	n	n
1	Syl-Tac	SF	larva	live	n	n
1	Syl-Tac	SF	larva	live	n	n
1	Syl-Tac	SF	larva	live	n	n
1	Syl-Tac	SR	larva	dead	y	y
1	Syl-Tac	SR	larva	dead	y	y
1	Syl-Tac	SR	larva	dead	y	y
1	Syl-Tac	SR	larva	dead	y	y
1	Syl-Tac	SR	larva	dead	y	y
1	Syl-Tac	SR	larva	dead	y	y
1	Syl-Tac	SR	larva	dead	y	y
1	Syl-Tac	SR	pupa	dead	y	y
1	Syl-Tac	SR	pupa	dead	y	y
1	Syl-Tac	SR	larva	dead	n	n
1	Syl-Tac	SR	larva	dead	n	n
1	Syl-Tac	SR	larva	live	n	n
2	Syl-Tac	HB	larva	dead	y	y
2	Syl-Tac	HB	larva	dead	y	y
2	Syl-Tac	HB	larva	dead	y	y
2	Syl-Tac	HB	pupa	dead	y	y
2	Syl-Tac	HB	larva	live	n	n
2	Syl-Tac	HB	larva	live	n	n
2	Syl-Tac	HB	pupa	live	n	n
2	Syl-Tac	HB	pupa	live	n	n
2	Syl-Tac	SF	pupa	dead	y	y
2	Syl-Tac	SF	pupa	dead	y	y
2	Syl-Tac	SF	pupa	dead	y	y
2	Syl-Tac	SF	larva	dead	n	n
2	Syl-Tac	SF	larva	live	n	n
2	Syl-Tac	SF	larva	live	n	n
2	Syl-Tac	SF	larva	live	n	n
2	Syl-Tac	SF	larva	live	n	n
2	Syl-Tac	SF	pupa	dead	n	n
2	Syl-Tac	SF	pupa	dead	n	n
2	Syl-Tac	SR	larva	dead	y	y
2	Syl-Tac	SR	larva	dead	y	y
2	Syl-Tac	SR	larva	dead	y	y
2	Syl-Tac	SR	pupa	dead	y	y
2	Syl-Tac	SR	pupa	dead	y	y
2	Syl-Tac	SR	larva	dead	n	n
2	Syl-Tac	SR	larva	live	n	n
2	Syl-Tac	SR	larva	live	n	n
2	Syl-Tac	SR	uk	live	n	n
3	Syl-Tac	HB	larva	dead	y	y
3	Syl-Tac	HB	larva	dead	y	y
3	Syl-Tac	HB	pupa	dead	y	y
3	Syl-Tac	HB	pupa	dead	y	y
3	Syl-Tac	HB	pupa	dead	y	y
3	Syl-Tac	HB	pupa	dead	y	y
3	Syl-Tac	HB	larva	dead	n	n
3	Syl-Tac	HB	larva	live	n	n
3	Syl-Tac	HB	pupa	live	n	n
3	Syl-Tac	SF	larva	dead	y	y
3	Syl-Tac	SF	larva	dead	y	y
3	Syl-Tac	SF	larva	dead	y	y
3	Syl-Tac	SF	pupa	dead	y	y
3	Syl-Tac	SF	pupa	dead	y	y
3	Syl-Tac	SF	larva	dead	n	n
3	Syl-Tac	SF	larva	dead	n	n
3	Syl-Tac	SF	larva	live	n	n
3	Syl-Tac	SF	larva	live	n	n
3	Syl-Tac	SF	larva	live	n	n
3	Syl-Tac	SF	larva	live	n	n
3	Syl-Tac	SR	larva	dead	y	y
3	Syl-Tac	SR	larva	dead	y	y
3	Syl-Tac	SR	larva	dead	y	y
3	Syl-Tac	SR	larva	dead	y	y
3	Syl-Tac	SR	larva	dead	y	y
3	Syl-Tac	SR	larva	dead	y	y
3	Syl-Tac	SR	larva	dead	y	y
3	Syl-Tac	SR	pupa	dead	y	y
3	Syl-Tac	SR	pupa	dead	y	y
3	Syl-Tac	SR	larva	dead	n	n
3	Syl-Tac	SR	larva	live	n	n
3	Syl-Tac	SR	pupa	live	n	n
1	Triton-x	SF	larva	dead	y	y
1	Triton-x	SF	larva	dead	y	y
1	Triton-x	SF	larva	dead	y	y
1	Triton-x	SF	pupa	dead	y	y
1	Triton-x	SF	pupa	dead	y	y
1	Triton-x	SF	larva	dead	n	n
1	Triton-x	SF	larva	dead	n	n
1	Triton-x	SF	larva	dead	n	n
1	Triton-x	SF	larva	live	n	n
1	Triton-x	SF	pupa	live	n	n
2	Triton-x	SF	larva	dead	y	y
2	Triton-x	SF	larva	dead	y	y
2	Triton-x	SF	pupa	dead	y	y
2	Triton-x	SF	pupa	dead	y	y
2	Triton-x	SF	larva	dead	n	n
2	Triton-x	SF	pupa	dead	n	n
2	Triton-x	SF	pupa	dead	n	n
2	Triton-x	SF	pupa	live	n	n
3	Triton-x	SF	larva	dead	y	y
3	Triton-x	SF	pupa	dead	y	y
3	Triton-x	SF	larva	dead	n	n
3	Triton-x	SF	larva	dead	n	n
3	Triton-x	SF	larva	live	n	n
3	Triton-x	SF	larva	live	n	n
3	Triton-x	SF	larva	live	n	n
3	Triton-x	SF	larva	live	n	n
3	Triton-x	SF	larva	live	n	n
3	Triton-x	SF	larva	live	n	n
3	Triton-x	SF	larva	live	n	n

## Sheet: Field Trial Data
Sample #	Farm	EPN Speceis	Adjuvant	Insect Stage	Insect Condition	EPN Infected
4	Bjelland	HB	Barricade	larva	dead	y
5	Bjelland	HB	Barricade	larva	live	n
13	Bjelland	HB	Barricade	larva	live	n
16	Bjelland	HB	Barricade	larva	live	n
2	Bjelland	HB	H2O-CTL	larva	dead	y
1	Bjelland	HB	H2O-CTL	larva	live	n
4	Bjelland	HB	H2O-CTL	larva	live	n
6	Bjelland	HB	H2O-CTL	larva	live	n
7	Bjelland	HB	H2O-CTL	larva	live	n
12	Bjelland	HB	H2O-CTL	larva	live	n
16	Bjelland	HB	H2O-CTL	larva	live	n
2	Bjelland	HB	Pentarra	larva	dead	y
1	Bjelland	HB	Pentarra	larva	live	n
4	Bjelland	HB	Pentarra	larva	live	n
13	Bjelland	HB	Pentarra	larva	live	n
16	Bjelland	HB	Pentarra	larva	live	n
17	Bjelland	HB	Pentarra	larva	live	n
20	Bjelland	HB	Pentarra	larva	live	n
7	Bjelland	HB	Silwet	larva	live	n
13	Bjelland	HB	Silwet	larva	live	n
15	Bjelland	HB	Silwet	larva	live	n
18	Bjelland	HB	Silwet	larva	live	n
15	Bjelland	HB	SunSpray	larva	dead	y
4	Bjelland	HB	SunSpray	larva	live	n
13	Bjelland	HB	SunSpray	larva	live	n
17	Bjelland	HB	SunSpray	larva	live	n
18	Bjelland	HB	SunSpray	larva	live	n
6	Bjelland	HB	Syl-Tac	larva	dead	y
8	Bjelland	HB	Syl-Tac	larva	dead	y
17	Bjelland	HB	Syl-Tac	larva	dead	y
4	Bjelland	HB	Syl-Tac	larva	live	n
5	Bjelland	HB	Syl-Tac	larva	live	n
9	Bjelland	HB	Syl-Tac	larva	live	n
13	Bjelland	HB	Syl-Tac	larva	live	n
15	Bjelland	HB	Syl-Tac	larva	dead	n
21	Bjelland	SF	Barricade	larva	dead	y
4	Bjelland	SF	Barricade	larva	live	n
10	Bjelland	SF	Barricade	larva	live	n
13	Bjelland	SF	Barricade	larva	live	n
15	Bjelland	SF	Barricade	larva	live	n
18	Bjelland	SF	Barricade	larva	live	n
20	Bjelland	SF	Barricade	larva	live	n
18	Bjelland	SF	H2O-CTL	larva	dead	y
1	Bjelland	SF	H2O-CTL	larva	live	n
9	Bjelland	SF	H2O-CTL	larva	live	n
17	Bjelland	SF	H2O-CTL	larva	live	n
5	Bjelland	SF	Pentarra	larva	live	n
7	Bjelland	SF	Pentarra	larva	live	n
11	Bjelland	SF	Pentarra	larva	live	n
12	Bjelland	SF	Pentarra	larva	live	n
14	Bjelland	SF	Pentarra	larva	live	n
8	Bjelland	SF	SunSpray	larva	live	n
18	Bjelland	SF	SunSpray	larva	live	n
2	Bjelland	SF	Syl-Tac	larva	dead	y
4	Bjelland	SF	Syl-Tac	larva	live	n
15	Bjelland	SF	Syl-Tac	larva	live	n
17	Bjelland	SF	Syl-Tac	larva	live	n
6	Bjelland	SR	Barricade	larva	dead	y
1	Bjelland	SR	Barricade	larva	live	n
13	Bjelland	SR	Barricade	larva	dead	n
2	Bjelland	SR	H2O-CTL	larva	dead	y
5	Bjelland	SR	H2O-CTL	larva	live	n
6	Bjelland	SR	H2O-CTL	larva	live	n
10	Bjelland	SR	H2O-CTL	larva	live	n
1	Bjelland	SR	Pentarra	larva	live	n
2	Bjelland	SR	Pentarra	larva	live	n
8	Bjelland	SR	Pentarra	larva	live	n
9	Bjelland	SR	Pentarra	larva	live	n
10	Bjelland	SR	Pentarra	larva	live	n
14	Bjelland	SR	Pentarra	larva	live	n
17	Bjelland	SR	Pentarra	larva	live	n
20	Bjelland	SR	Pentarra	larva	live	n
3	Bjelland	SR	Silwet	larva	dead	y
16	Bjelland	SR	Silwet	larva	dead	y
4	Bjelland	SR	Silwet	larva	live	n
9	Bjelland	SR	Silwet	larva	live	n
12	Bjelland	SR	Silwet	larva	live	n
18	Bjelland	SR	Silwet	larva	live	n
14	Bjelland	SR	SunSpray	larva	dead	y
1	Bjelland	SR	SunSpray	larva	live	n
9	Bjelland	SR	SunSpray	larva	live	n
15	Bjelland	SR	SunSpray	larva	live	n
19	Bjelland	SR	SunSpray	larva	live	n
20	Bjelland	SR	SunSpray	larva	live	n
1	Bjelland	SR	Syl-Tac	larva	live	n
2	Bjelland	SR	Syl-Tac	larva	live	n
6	Bjelland	SR	Syl-Tac	larva	live	n
11	Bjelland	SR	Syl-Tac	larva	dead	n
12	Bjelland	SR	Syl-Tac	larva	live	n
13	Bjelland	SR	Syl-Tac	larva	live	n
16	Bjelland	SR	Syl-Tac	larva	live	n
19	Bjelland	SR	Syl-Tac	larva	live	n
1	Johnson	HB	Barricade	larva	live	n
4	Johnson	HB	H2O-CTL	larva	dead	y
8	Johnson	HB	Pentarra	larva	live	n
14	Johnson	HB	Pentarra	larva	live	n
3	Johnson	HB	Pentarra	larva	dead	y
1	Johnson	HB	SunSpray	larva	dead	y
19	Johnson	HB	SunSpray	larva	dead	y
20	Johnson	HB	SunSpray	larva	dead	y
14	Johnson	HB	SunSpray	larva	live	n
11	Johnson	SF	Syl-Tac	larva	live	n
7	Johnson	SR	Barricade	larva	live	n
15	Johnson	SR	Pentarra	larva	live	n
5	Johnson	SR	SunSpray	larva	live	n
8	Johnson	SR	SunSpray	larva	live	n
8	Schuler	HB	Barricade	larva	dead	y
1	Schuler	HB	Barricade	larva	live	n
3	Schuler	HB	Barricade	larva	live	n
5	Schuler	HB	Barricade	larva	live	n
9	Schuler	HB	Barricade	larva	live	n
10	Schuler	HB	Barricade	larva	live	n
11	Schuler	HB	Barricade	larva	live	n
14	Schuler	HB	Barricade	larva	dead	y
14	Schuler	HB	H2O-CTL	larva	live	n
15	Schuler	HB	H2O-CTL	larva	live	n
17	Schuler	HB	H2O-CTL	larva	live	n
7	Schuler	HB	Pentarra	larva	dead	y
13	Schuler	HB	Pentarra	larva	dead	y
21	Schuler	HB	Pentarra	larva	dead	y
4	Schuler	HB	Pentarra	larva	live	n
5	Schuler	HB	Pentarra	larva	live	n
8	Schuler	HB	Pentarra	larva	live	n
12	Schuler	HB	Pentarra	larva	live	n
17	Schuler	HB	Pentarra	larva	live	n
19	Schuler	HB	Pentarra	larva	live	n
1	Schuler	HB	Silwet	larva	live	n
3	Schuler	HB	Silwet	larva	live	n
5	Schuler	HB	Silwet	larva	live	n
8	Schuler	HB	Silwet	larva	live	n
17	Schuler	HB	Silwet	larva	live	n
19	Schuler	HB	Silwet	larva	live	n
18	Schuler	HB	SunSpray	larva	dead	y
1	Schuler	HB	SunSpray	larva	live	n
2	Schuler	HB	SunSpray	larva	live	n
3	Schuler	HB	SunSpray	larva	live	n
9	Schuler	HB	SunSpray	larva	live	n
12	Schuler	HB	SunSpray	larva	live	n
17	Schuler	HB	SunSpray	larva	live	n
5	Schuler	SF	Barricade	larva	dead	y
7	Schuler	SF	Barricade	larva	dead	y
17	Schuler	SF	Barricade	larva	dead	y
3	Schuler	SF	Barricade	larva	live	n
8	Schuler	SF	Barricade	larva	live	n
9	Schuler	SF	Barricade	larva	live	n
12	Schuler	SF	Barricade	larva	live	n
14	Schuler	SF	Barricade	larva	live	n
18	Schuler	SF	Barricade	larva	dead	n
19	Schuler	SF	Barricade	larva	live	n
3	Schuler	SF	H2O-CTL	larva	dead	y
5	Schuler	SF	H2O-CTL	larva	dead	y
11	Schuler	SF	H2O-CTL	larva	dead	y
1	Schuler	SF	H2O-CTL	larva	live	n
9	Schuler	SF	H2O-CTL	larva	live	n
13	Schuler	SF	H2O-CTL	larva	live	n
19	Schuler	SF	H2O-CTL	larva	live	n
15	Schuler	SF	H2O-CTL	larva	dead	y
1	Schuler	SF	Pentarra	larva	dead	y
2	Schuler	SF	Pentarra	larva	dead	y
7	Schuler	SF	Pentarra	larva	dead	y
12	Schuler	SF	Pentarra	larva	dead	y
11	Schuler	SF	Pentarra	larva	live	n
20	Schuler	SF	Pentarra	larva	live	n
10	Schuler	SF	Silwet	larva	dead	y
20	Schuler	SF	Silwet	larva	dead	y
1	Schuler	SF	Silwet	larva	live	n
2	Schuler	SF	Silwet	larva	live	n
6	Schuler	SF	Silwet	larva	live	n
8	Schuler	SF	Silwet	larva	live	n
15	Schuler	SF	Silwet	larva	live	n
16	Schuler	SF	Silwet	larva	live	n
17	Schuler	SF	Silwet	larva	live	n
18	Schuler	SF	Silwet	larva	live	n
10	Schuler	SF	SunSpray	larva	dead	y
1	Schuler	SF	SunSpray	larva	live	n
4	Schuler	SF	SunSpray	larva	live	n
13	Schuler	SF	SunSpray	larva	dead	n
15	Schuler	SF	SunSpray	larva	live	n
1	Schuler	SF	Syl-Tac	larva	dead	y
4	Schuler	SF	Syl-Tac	larva	dead	y
9	Schuler	SF	Syl-Tac	larva	dead	y
5	Schuler	SF	Syl-Tac	larva	live	n
7	Schuler	SF	Syl-Tac	larva	live	n
11	Schuler	SF	Syl-Tac	larva	live	n
1	Schuler	SR	H2O-CTL	larva	live	n
5	Schuler	SR	H2O-CTL	larva	live	n
7	Schuler	SR	H2O-CTL	larva	live	n
9	Schuler	SR	H2O-CTL	larva	live	n
10	Schuler	SR	H2O-CTL	larva	live	n
12	Schuler	SR	H2O-CTL	larva	live	n
13	Schuler	SR	H2O-CTL	larva	live	n
18	Schuler	SR	H2O-CTL	larva	live	n
19	Schuler	SR	H2O-CTL	larva	live	n
6	Schuler	SR	Pentarra	larva	live	n
9	Schuler	SR	Pentarra	larva	live	n
12	Schuler	SR	Pentarra	larva	live	n
13	Schuler	SR	Pentarra	larva	live	n
14	Schuler	SR	Pentarra	larva	live	n
17	Schuler	SR	Pentarra	larva	live	n
18	Schuler	SR	Pentarra	larva	live	n
20	Schuler	SR	Pentarra	larva	live	n
11	Schuler	SR	Pentarra	larva	dead	y
3	Schuler	SR	Silwet	larva	live	n
6	Schuler	SR	Silwet	larva	live	n
10	Schuler	SR	Silwet	larva	live	n
11	Schuler	SR	Silwet	larva	live	n
13	Schuler	SR	Silwet	larva	live	n
14	Schuler	SR	Silwet	larva	live	n
15	Schuler	SR	Silwet	larva	live	n
2	Schuler	SR	SunSpray	larva	dead	y
16	Schuler	SR	SunSpray	larva	dead	y
1	Schuler	SR	SunSpray	larva	live	n
5	Schuler	SR	SunSpray	larva	live	n
6	Schuler	SR	SunSpray	larva	live	n
8	Schuler	SR	SunSpray	larva	live	n
9	Schuler	SR	SunSpray	larva	live	n
10	Schuler	SR	SunSpray	larva	live	n
12	Schuler	SR	SunSpray	larva	live	n
13	Schuler	SR	SunSpray	larva	live	n
19	Schuler	SR	SunSpray	larva	live	n
20	Schuler	SR	SunSpray	larva	live	n
11	Schuler	SR	Syl-Tac	larva	dead	y
4	Schuler	SR	Syl-Tac	larva	live	n
7	Schuler	SR	Syl-Tac	larva	live	n
9	Schuler	SR	Syl-Tac	larva	live	n
13	Schuler	SR	Syl-Tac	larva	live	n
17	Schuler	SR	Syl-Tac	larva	live	n
18	Schuler	SR	Syl-Tac	larva	live	n
20	Schuler	SR	Syl-Tac	larva	live	n
2	Bjelland	None	Neg CTL	larva	dead	n
4	Bjelland	None	Neg CTL	larva	live	n
7	Bjelland	None	Neg CTL	larva	live	n
9	Bjelland	None	Neg CTL	larva	dead	n
16	Bjelland	None	Neg CTL	larva	dead	n
19	Bjelland	None	Neg CTL	larva	dead	n
28	Bjelland	None	Neg CTL	larva	live	n
30	Bjelland	None	Neg CTL	larva	live	n
1	Johnson	None	Neg CTL	larva	dead	n
13	Johnson	None	Neg CTL	larva	dead	n
25	Johnson	None	Neg CTL	larva	dead	n
28	Johnson	None	Neg CTL	larva	dead	n
1	Schuler	None	Neg CTL	larva	live	n
7	Schuler	None	Neg CTL	larva	dead	n
11	Schuler	None	Neg CTL	larva	dead	n
12	Schuler	None	Neg CTL	larva	live	n
13	Schuler	None	Neg CTL	larva	dead	n
1	Bjelland	HB	Barricade	pupa	live	n
2	Bjelland	HB	Barricade	pupa	live	n
3	Bjelland	HB	Barricade	pupa	live	n
7	Bjelland	HB	Barricade	pupa	live	n
8	Bjelland	HB	Barricade	pupa	live	n
9	Bjelland	HB	Barricade	pupa	live	n
10	Bjelland	HB	Barricade	pupa	live	n
11	Bjelland	HB	Barricade	pupa	live	n
12	Bjelland	HB	Barricade	pupa	live	n
14	Bjelland	HB	Barricade	pupa	live	n
15	Bjelland	HB	Barricade	pupa	live	n
17	Bjelland	HB	Barricade	pupa	live	n
18	Bjelland	HB	Barricade	pupa	live	n
19	Bjelland	HB	Barricade	pupa	live	n
20	Bjelland	HB	Barricade	pupa	live	n
3	Bjelland	HB	H2O-CTL	pupa	live	n
5	Bjelland	HB	H2O-CTL	pupa	live	n
8	Bjelland	HB	H2O-CTL	pupa	live	n
9	Bjelland	HB	H2O-CTL	pupa	live	n
10	Bjelland	HB	H2O-CTL	pupa	live	n
11	Bjelland	HB	H2O-CTL	pupa	live	n
13	Bjelland	HB	H2O-CTL	pupa	live	n
14	Bjelland	HB	H2O-CTL	pupa	live	n
15	Bjelland	HB	H2O-CTL	pupa	live	n
17	Bjelland	HB	H2O-CTL	pupa	live	n
18	Bjelland	HB	H2O-CTL	pupa	live	n
19	Bjelland	HB	H2O-CTL	pupa	live	n
20	Bjelland	HB	H2O-CTL	pupa	live	n
3	Bjelland	HB	Pentarra	pupa	live	n
5	Bjelland	HB	Pentarra	pupa	live	n
6	Bjelland	HB	Pentarra	pupa	live	n
7	Bjelland	HB	Pentarra	pupa	live	n
8	Bjelland	HB	Pentarra	pupa	live	n
9	Bjelland	HB	Pentarra	pupa	live	n
10	Bjelland	HB	Pentarra	pupa	live	n
11	Bjelland	HB	Pentarra	pupa	live	n
12	Bjelland	HB	Pentarra	pupa	live	n
14	Bjelland	HB	Pentarra	pupa	live	n
15	Bjelland	HB	Pentarra	pupa	live	n
18	Bjelland	HB	Pentarra	pupa	live	n
19	Bjelland	HB	Pentarra	pupa	live	n
1	Bjelland	HB	Silwet	pupa	live	n
3	Bjelland	HB	Silwet	pupa	live	n
4	Bjelland	HB	Silwet	pupa	live	n
5	Bjelland	HB	Silwet	pupa	live	n
6	Bjelland	HB	Silwet	pupa	live	n
8	Bjelland	HB	Silwet	pupa	live	n
9	Bjelland	HB	Silwet	pupa	live	n
10	Bjelland	HB	Silwet	pupa	live	n
11	Bjelland	HB	Silwet	pupa	live	n
12	Bjelland	HB	Silwet	pupa	live	n
16	Bjelland	HB	Silwet	pupa	live	n
17	Bjelland	HB	Silwet	pupa	live	n
19	Bjelland	HB	Silwet	pupa	live	n
20	Bjelland	HB	Silwet	pupa	dead	n
1	Bjelland	HB	SunSpray	pupa	live	n
2	Bjelland	HB	SunSpray	pupa	live	n
5	Bjelland	HB	SunSpray	pupa	live	n
6	Bjelland	HB	SunSpray	pupa	live	n
7	Bjelland	HB	SunSpray	pupa	live	n
10	Bjelland	HB	SunSpray	pupa	live	n
11	Bjelland	HB	SunSpray	pupa	live	n
12	Bjelland	HB	SunSpray	pupa	live	n
14	Bjelland	HB	SunSpray	pupa	live	n
16	Bjelland	HB	SunSpray	pupa	live	n
19	Bjelland	HB	SunSpray	pupa	live	n
20	Bjelland	HB	SunSpray	pupa	live	n
1	Bjelland	HB	Syl-Tac	pupa	live	n
2	Bjelland	HB	Syl-Tac	pupa	live	n
3	Bjelland	HB	Syl-Tac	pupa	live	n
7	Bjelland	HB	Syl-Tac	pupa	live	n
10	Bjelland	HB	Syl-Tac	pupa	live	n
11	Bjelland	HB	Syl-Tac	pupa	live	n
12	Bjelland	HB	Syl-Tac	pupa	live	n
14	Bjelland	HB	Syl-Tac	pupa	live	n
18	Bjelland	HB	Syl-Tac	pupa	live	n
19	Bjelland	HB	Syl-Tac	pupa	live	n
20	Bjelland	HB	Syl-Tac	pupa	live	n
1	Bjelland	SF	Barricade	pupa	live	n
2	Bjelland	SF	Barricade	pupa	live	n
3	Bjelland	SF	Barricade	pupa	live	n
5	Bjelland	SF	Barricade	pupa	live	n
6	Bjelland	SF	Barricade	pupa	live	n
7	Bjelland	SF	Barricade	pupa	live	n
8	Bjelland	SF	Barricade	pupa	live	n
9	Bjelland	SF	Barricade	pupa	live	n
12	Bjelland	SF	Barricade	pupa	live	n
14	Bjelland	SF	Barricade	pupa	live	n
16	Bjelland	SF	Barricade	pupa	live	n
17	Bjelland	SF	Barricade	pupa	live	n
19	Bjelland	SF	Barricade	pupa	live	n
2	Bjelland	SF	H2O-CTL	pupa	live	n
3	Bjelland	SF	H2O-CTL	pupa	live	n
4	Bjelland	SF	H2O-CTL	pupa	live	n
5	Bjelland	SF	H2O-CTL	pupa	live	n
6	Bjelland	SF	H2O-CTL	pupa	live	n
7	Bjelland	SF	H2O-CTL	pupa	live	n
8	Bjelland	SF	H2O-CTL	pupa	live	n
10	Bjelland	SF	H2O-CTL	pupa	live	n
11	Bjelland	SF	H2O-CTL	pupa	live	n
12	Bjelland	SF	H2O-CTL	pupa	live	n
13	Bjelland	SF	H2O-CTL	pupa	live	n
14	Bjelland	SF	H2O-CTL	pupa	live	n
15	Bjelland	SF	H2O-CTL	pupa	live	n
16	Bjelland	SF	H2O-CTL	pupa	live	n
19	Bjelland	SF	H2O-CTL	pupa	live	n
20	Bjelland	SF	H2O-CTL	pupa	live	n
1	Bjelland	SF	Pentarra	pupa	live	n
2	Bjelland	SF	Pentarra	pupa	live	n
3	Bjelland	SF	Pentarra	pupa	live	n
4	Bjelland	SF	Pentarra	pupa	live	n
6	Bjelland	SF	Pentarra	pupa	live	n
8	Bjelland	SF	Pentarra	pupa	live	n
9	Bjelland	SF	Pentarra	pupa	live	n
10	Bjelland	SF	Pentarra	pupa	live	n
13	Bjelland	SF	Pentarra	pupa	live	n
15	Bjelland	SF	Pentarra	pupa	live	n
16	Bjelland	SF	Pentarra	pupa	live	n
17	Bjelland	SF	Pentarra	pupa	live	n
18	Bjelland	SF	Pentarra	pupa	live	n
19	Bjelland	SF	Pentarra	pupa	live	n
20	Bjelland	SF	Pentarra	pupa	live	n
1	Bjelland	SF	Silwet	pupa	live	n
2	Bjelland	SF	Silwet	pupa	live	n
3	Bjelland	SF	Silwet	pupa	live	n
4	Bjelland	SF	Silwet	pupa	live	n
5	Bjelland	SF	Silwet	pupa	live	n
6	Bjelland	SF	Silwet	pupa	live	n
7	Bjelland	SF	Silwet	pupa	live	n
8	Bjelland	SF	Silwet	pupa	live	n
9	Bjelland	SF	Silwet	pupa	live	n
10	Bjelland	SF	Silwet	pupa	live	n
11	Bjelland	SF	Silwet	pupa	live	n
12	Bjelland	SF	Silwet	pupa	live	n
13	Bjelland	SF	Silwet	pupa	live	n
14	Bjelland	SF	Silwet	pupa	live	n
15	Bjelland	SF	Silwet	pupa	live	n
16	Bjelland	SF	Silwet	pupa	live	n
17	Bjelland	SF	Silwet	pupa	live	n
18	Bjelland	SF	Silwet	pupa	live	n
19	Bjelland	SF	Silwet	pupa	live	n
20	Bjelland	SF	Silwet	pupa	live	n
1	Bjelland	SF	SunSpray	pupa	live	n
2	Bjelland	SF	SunSpray	pupa	live	n
3	Bjelland	SF	SunSpray	pupa	live	n
4	Bjelland	SF	SunSpray	pupa	live	n
5	Bjelland	SF	SunSpray	pupa	live	n
6	Bjelland	SF	SunSpray	pupa	live	n
7	Bjelland	SF	SunSpray	pupa	live	n
9	Bjelland	SF	SunSpray	pupa	live	n
10	Bjelland	SF	SunSpray	pupa	live	n
11	Bjelland	SF	SunSpray	pupa	live	n
12	Bjelland	SF	SunSpray	pupa	live	n
13	Bjelland	SF	SunSpray	pupa	live	n
14	Bjelland	SF	SunSpray	pupa	live	n
15	Bjelland	SF	SunSpray	pupa	live	n
16	Bjelland	SF	SunSpray	pupa	live	n
17	Bjelland	SF	SunSpray	pupa	live	n
19	Bjelland	SF	SunSpray	pupa	live	n
20	Bjelland	SF	SunSpray	pupa	live	n
1	Bjelland	SF	Syl-Tac	pupa	live	n
3	Bjelland	SF	Syl-Tac	pupa	live	n
5	Bjelland	SF	Syl-Tac	pupa	live	n
6	Bjelland	SF	Syl-Tac	pupa	live	n
7	Bjelland	SF	Syl-Tac	pupa	live	n
8	Bjelland	SF	Syl-Tac	pupa	live	n
9	Bjelland	SF	Syl-Tac	pupa	live	n
10	Bjelland	SF	Syl-Tac	pupa	live	n
11	Bjelland	SF	Syl-Tac	pupa	live	n
12	Bjelland	SF	Syl-Tac	pupa	live	n
13	Bjelland	SF	Syl-Tac	pupa	live	n
14	Bjelland	SF	Syl-Tac	pupa	live	n
16	Bjelland	SF	Syl-Tac	pupa	live	n
18	Bjelland	SF	Syl-Tac	pupa	live	n
19	Bjelland	SF	Syl-Tac	pupa	live	n
20	Bjelland	SF	Syl-Tac	pupa	live	n
2	Bjelland	SR	Barricade	pupa	live	n
3	Bjelland	SR	Barricade	pupa	live	n
4	Bjelland	SR	Barricade	pupa	live	n
5	Bjelland	SR	Barricade	pupa	live	n
7	Bjelland	SR	Barricade	pupa	live	n
8	Bjelland	SR	Barricade	pupa	live	n
9	Bjelland	SR	Barricade	pupa	live	n
10	Bjelland	SR	Barricade	pupa	live	n
11	Bjelland	SR	Barricade	pupa	live	n
12	Bjelland	SR	Barricade	pupa	live	n
15	Bjelland	SR	Barricade	pupa	live	n
16	Bjelland	SR	Barricade	pupa	live	n
17	Bjelland	SR	Barricade	pupa	live	n
18	Bjelland	SR	Barricade	pupa	live	n
19	Bjelland	SR	Barricade	pupa	live	n
1	Bjelland	SR	H2O-CTL	pupa	live	n
3	Bjelland	SR	H2O-CTL	pupa	live	n
4	Bjelland	SR	H2O-CTL	pupa	live	n
7	Bjelland	SR	H2O-CTL	pupa	live	n
8	Bjelland	SR	H2O-CTL	pupa	live	n
9	Bjelland	SR	H2O-CTL	pupa	live	n
11	Bjelland	SR	H2O-CTL	pupa	live	n
12	Bjelland	SR	H2O-CTL	pupa	live	n
13	Bjelland	SR	H2O-CTL	pupa	live	n
14	Bjelland	SR	H2O-CTL	pupa	live	n
15	Bjelland	SR	H2O-CTL	pupa	live	n
16	Bjelland	SR	H2O-CTL	pupa	live	n
17	Bjelland	SR	H2O-CTL	pupa	live	n
18	Bjelland	SR	H2O-CTL	pupa	live	n
19	Bjelland	SR	H2O-CTL	pupa	live	n
20	Bjelland	SR	H2O-CTL	pupa	live	n
3	Bjelland	SR	Pentarra	pupa	live	n
4	Bjelland	SR	Pentarra	pupa	live	n
5	Bjelland	SR	Pentarra	pupa	live	n
6	Bjelland	SR	Pentarra	pupa	live	n
7	Bjelland	SR	Pentarra	pupa	live	n
11	Bjelland	SR	Pentarra	pupa	live	n
12	Bjelland	SR	Pentarra	pupa	live	n
13	Bjelland	SR	Pentarra	pupa	live	n
15	Bjelland	SR	Pentarra	pupa	live	n
16	Bjelland	SR	Pentarra	pupa	live	n
18	Bjelland	SR	Pentarra	pupa	live	n
1	Bjelland	SR	Silwet	pupa	live	n
2	Bjelland	SR	Silwet	pupa	live	n
5	Bjelland	SR	Silwet	pupa	live	n
6	Bjelland	SR	Silwet	pupa	live	n
7	Bjelland	SR	Silwet	pupa	live	n
8	Bjelland	SR	Silwet	pupa	live	n
10	Bjelland	SR	Silwet	pupa	live	n
11	Bjelland	SR	Silwet	pupa	live	n
13	Bjelland	SR	Silwet	pupa	live	n
14	Bjelland	SR	Silwet	pupa	live	n
15	Bjelland	SR	Silwet	pupa	live	n
17	Bjelland	SR	Silwet	pupa	live	n
19	Bjelland	SR	Silwet	pupa	live	n
20	Bjelland	SR	Silwet	pupa	live	n
2	Bjelland	SR	SunSpray	pupa	live	n
3	Bjelland	SR	SunSpray	pupa	live	n
4	Bjelland	SR	SunSpray	pupa	live	n
5	Bjelland	SR	SunSpray	pupa	live	n
6	Bjelland	SR	SunSpray	pupa	live	n
7	Bjelland	SR	SunSpray	pupa	live	n
8	Bjelland	SR	SunSpray	pupa	live	n
10	Bjelland	SR	SunSpray	pupa	live	n
11	Bjelland	SR	SunSpray	pupa	live	n
12	Bjelland	SR	SunSpray	pupa	live	n
13	Bjelland	SR	SunSpray	pupa	live	n
16	Bjelland	SR	SunSpray	pupa	live	n
17	Bjelland	SR	SunSpray	pupa	live	n
18	Bjelland	SR	SunSpray	pupa	live	n
3	Bjelland	SR	Syl-Tac	pupa	live	n
4	Bjelland	SR	Syl-Tac	pupa	live	n
5	Bjelland	SR	Syl-Tac	pupa	live	n
7	Bjelland	SR	Syl-Tac	pupa	live	n
8	Bjelland	SR	Syl-Tac	pupa	live	n
9	Bjelland	SR	Syl-Tac	pupa	live	n
10	Bjelland	SR	Syl-Tac	pupa	live	n
14	Bjelland	SR	Syl-Tac	pupa	live	n
15	Bjelland	SR	Syl-Tac	pupa	live	n
17	Bjelland	SR	Syl-Tac	pupa	live	n
20	Bjelland	SR	Syl-Tac	pupa	live	n
2	Johnson	HB	Barricade	pupa	live	n
3	Johnson	HB	Barricade	pupa	live	n
4	Johnson	HB	Barricade	pupa	live	n
5	Johnson	HB	Barricade	pupa	live	n
6	Johnson	HB	Barricade	pupa	live	n
7	Johnson	HB	Barricade	pupa	live	n
8	Johnson	HB	Barricade	pupa	live	n
12	Johnson	HB	Barricade	pupa	live	n
13	Johnson	HB	Barricade	pupa	live	n
14	Johnson	HB	Barricade	pupa	live	n
15	Johnson	HB	Barricade	pupa	live	n
16	Johnson	HB	Barricade	pupa	live	n
17	Johnson	HB	Barricade	pupa	live	n
18	Johnson	HB	Barricade	pupa	live	n
20	Johnson	HB	Barricade	pupa	live	n
1	Johnson	HB	H2O-CTL	pupa	live	n
2	Johnson	HB	H2O-CTL	pupa	live	n
3	Johnson	HB	H2O-CTL	pupa	live	n
6	Johnson	HB	H2O-CTL	pupa	live	n
7	Johnson	HB	H2O-CTL	pupa	live	n
8	Johnson	HB	H2O-CTL	pupa	live	n
10	Johnson	HB	H2O-CTL	pupa	live	n
12	Johnson	HB	H2O-CTL	pupa	live	n
13	Johnson	HB	H2O-CTL	pupa	live	n
1	Johnson	HB	Pentarra	pupa	live	n
2	Johnson	HB	Pentarra	pupa	live	n
4	Johnson	HB	Pentarra	pupa	live	n
5	Johnson	HB	Pentarra	pupa	live	n
6	Johnson	HB	Pentarra	pupa	live	n
7	Johnson	HB	Pentarra	pupa	live	n
10	Johnson	HB	Pentarra	pupa	live	n
11	Johnson	HB	Pentarra	pupa	live	n
12	Johnson	HB	Pentarra	pupa	live	n
13	Johnson	HB	Pentarra	pupa	live	n
15	Johnson	HB	Pentarra	pupa	live	n
16	Johnson	HB	Pentarra	pupa	live	n
17	Johnson	HB	Pentarra	pupa	live	n
18	Johnson	HB	Pentarra	pupa	live	n
19	Johnson	HB	Pentarra	pupa	live	n
20	Johnson	HB	Pentarra	pupa	live	n
1	Johnson	HB	Silwet	pupa	live	n
2	Johnson	HB	Silwet	pupa	live	n
4	Johnson	HB	Silwet	pupa	live	n
5	Johnson	HB	Silwet	pupa	live	n
8	Johnson	HB	Silwet	pupa	live	n
11	Johnson	HB	Silwet	pupa	live	n
12	Johnson	HB	Silwet	pupa	live	n
13	Johnson	HB	Silwet	pupa	live	n
14	Johnson	HB	Silwet	pupa	live	n
15	Johnson	HB	Silwet	pupa	live	n
18	Johnson	HB	Silwet	pupa	live	n
20	Johnson	HB	Silwet	pupa	live	n
2	Johnson	HB	SunSpray	pupa	live	n
4	Johnson	HB	SunSpray	pupa	live	n
5	Johnson	HB	SunSpray	pupa	live	n
7	Johnson	HB	SunSpray	pupa	live	n
8	Johnson	HB	SunSpray	pupa	live	n
9	Johnson	HB	SunSpray	pupa	live	n
12	Johnson	HB	SunSpray	pupa	live	n
15	Johnson	HB	SunSpray	pupa	live	n
16	Johnson	HB	SunSpray	pupa	live	n
18	Johnson	HB	SunSpray	pupa	live	n
2	Johnson	HB	Syl-Tac	pupa	live	n
3	Johnson	HB	Syl-Tac	pupa	live	n
5	Johnson	HB	Syl-Tac	pupa	live	n
6	Johnson	HB	Syl-Tac	pupa	live	n
7	Johnson	HB	Syl-Tac	pupa	live	n
8	Johnson	HB	Syl-Tac	pupa	live	n
9	Johnson	HB	Syl-Tac	pupa	live	n
10	Johnson	HB	Syl-Tac	pupa	live	n
11	Johnson	HB	Syl-Tac	pupa	live	n
12	Johnson	HB	Syl-Tac	pupa	live	n
13	Johnson	HB	Syl-Tac	pupa	live	n
14	Johnson	HB	Syl-Tac	pupa	live	n
15	Johnson	HB	Syl-Tac	pupa	live	n
16	Johnson	HB	Syl-Tac	pupa	live	n
18	Johnson	HB	Syl-Tac	pupa	live	n
19	Johnson	HB	Syl-Tac	pupa	live	n
1	Johnson	SF	Barricade	pupa	live	n
2	Johnson	SF	Barricade	pupa	live	n
4	Johnson	SF	Barricade	pupa	live	n
5	Johnson	SF	Barricade	pupa	live	n
6	Johnson	SF	Barricade	pupa	live	n
8	Johnson	SF	Barricade	pupa	live	n
10	Johnson	SF	Barricade	pupa	live	n
11	Johnson	SF	Barricade	pupa	live	n
13	Johnson	SF	Barricade	pupa	live	n
14	Johnson	SF	Barricade	pupa	live	n
15	Johnson	SF	Barricade	pupa	live	n
16	Johnson	SF	Barricade	pupa	live	n
17	Johnson	SF	Barricade	pupa	live	n
19	Johnson	SF	Barricade	pupa	live	n
20	Johnson	SF	Barricade	pupa	live	n
2	Johnson	SF	H2O-CTL	pupa	live	n
4	Johnson	SF	H2O-CTL	pupa	live	n
5	Johnson	SF	H2O-CTL	pupa	live	n
7	Johnson	SF	H2O-CTL	pupa	live	n
8	Johnson	SF	H2O-CTL	pupa	live	n
12	Johnson	SF	H2O-CTL	pupa	live	n
13	Johnson	SF	H2O-CTL	pupa	live	n
14	Johnson	SF	H2O-CTL	pupa	live	n
15	Johnson	SF	H2O-CTL	pupa	live	n
17	Johnson	SF	H2O-CTL	pupa	live	n
2	Johnson	SF	Pentarra	pupa	live	n
5	Johnson	SF	Pentarra	pupa	live	n
6	Johnson	SF	Pentarra	pupa	live	n
9	Johnson	SF	Pentarra	pupa	live	n
10	Johnson	SF	Pentarra	pupa	live	n
13	Johnson	SF	Pentarra	pupa	live	n
15	Johnson	SF	Pentarra	pupa	live	n
16	Johnson	SF	Pentarra	pupa	live	n
18	Johnson	SF	Pentarra	pupa	live	n
19	Johnson	SF	Pentarra	pupa	live	n
3	Johnson	SF	Silwet	pupa	dead	y
1	Johnson	SF	Silwet	pupa	live	n
4	Johnson	SF	Silwet	pupa	live	n
6	Johnson	SF	Silwet	pupa	live	n
7	Johnson	SF	Silwet	pupa	live	n
8	Johnson	SF	Silwet	pupa	live	n
9	Johnson	SF	Silwet	pupa	live	n
10	Johnson	SF	Silwet	pupa	live	n
11	Johnson	SF	Silwet	pupa	live	n
12	Johnson	SF	Silwet	pupa	live	n
13	Johnson	SF	Silwet	pupa	live	n
15	Johnson	SF	Silwet	pupa	live	n
16	Johnson	SF	Silwet	pupa	live	n
17	Johnson	SF	Silwet	pupa	live	n
18	Johnson	SF	Silwet	pupa	live	n
19	Johnson	SF	Silwet	pupa	live	n
20	Johnson	SF	Silwet	pupa	live	n
12	Johnson	SF	SunSpray	pupa	dead	y
1	Johnson	SF	SunSpray	pupa	live	n
2	Johnson	SF	SunSpray	pupa	live	n
3	Johnson	SF	SunSpray	pupa	live	n
4	Johnson	SF	SunSpray	pupa	live	n
5	Johnson	SF	SunSpray	pupa	live	n
9	Johnson	SF	SunSpray	pupa	live	n
11	Johnson	SF	SunSpray	pupa	live	n
13	Johnson	SF	SunSpray	pupa	live	n
14	Johnson	SF	SunSpray	pupa	live	n
15	Johnson	SF	SunSpray	pupa	live	n
16	Johnson	SF	SunSpray	pupa	live	n
18	Johnson	SF	SunSpray	pupa	live	n
15	Johnson	SF	Syl-Tac	pupa	dead	y
1	Johnson	SF	Syl-Tac	pupa	live	n
2	Johnson	SF	Syl-Tac	pupa	live	n
5	Johnson	SF	Syl-Tac	pupa	live	n
6	Johnson	SF	Syl-Tac	pupa	live	n
7	Johnson	SF	Syl-Tac	pupa	live	n
9	Johnson	SF	Syl-Tac	pupa	live	n
10	Johnson	SF	Syl-Tac	pupa	live	n
12	Johnson	SF	Syl-Tac	pupa	live	n
13	Johnson	SF	Syl-Tac	pupa	live	n
14	Johnson	SF	Syl-Tac	pupa	live	n
16	Johnson	SF	Syl-Tac	pupa	live	n
17	Johnson	SF	Syl-Tac	pupa	live	n
19	Johnson	SF	Syl-Tac	pupa	live	n
20	Johnson	SF	Syl-Tac	pupa	live	n
1	Johnson	SR	Barricade	pupa	live	n
2	Johnson	SR	Barricade	pupa	live	n
3	Johnson	SR	Barricade	pupa	live	n
4	Johnson	SR	Barricade	pupa	live	n
5	Johnson	SR	Barricade	pupa	live	n
6	Johnson	SR	Barricade	pupa	live	n
8	Johnson	SR	Barricade	pupa	live	n
9	Johnson	SR	Barricade	pupa	live	n
10	Johnson	SR	Barricade	pupa	live	n
11	Johnson	SR	Barricade	pupa	live	n
12	Johnson	SR	Barricade	pupa	live	n
13	Johnson	SR	Barricade	pupa	live	n
14	Johnson	SR	Barricade	pupa	live	n
15	Johnson	SR	Barricade	pupa	live	n
16	Johnson	SR	Barricade	pupa	live	n
17	Johnson	SR	Barricade	pupa	live	n
18	Johnson	SR	Barricade	pupa	live	n
19	Johnson	SR	Barricade	pupa	live	n
20	Johnson	SR	Barricade	pupa	live	n
19	Johnson	SR	H2O-CTL	pupa	dead	y
1	Johnson	SR	H2O-CTL	pupa	live	n
2	Johnson	SR	H2O-CTL	pupa	live	n
3	Johnson	SR	H2O-CTL	pupa	live	n
4	Johnson	SR	H2O-CTL	pupa	live	n
5	Johnson	SR	H2O-CTL	pupa	live	n
6	Johnson	SR	H2O-CTL	pupa	live	n
7	Johnson	SR	H2O-CTL	pupa	live	n
8	Johnson	SR	H2O-CTL	pupa	live	n
9	Johnson	SR	H2O-CTL	pupa	live	n
10	Johnson	SR	H2O-CTL	pupa	live	n
11	Johnson	SR	H2O-CTL	pupa	live	n
12	Johnson	SR	H2O-CTL	pupa	live	n
13	Johnson	SR	H2O-CTL	pupa	live	n
14	Johnson	SR	H2O-CTL	pupa	live	n
15	Johnson	SR	H2O-CTL	pupa	live	n
16	Johnson	SR	H2O-CTL	pupa	live	n
17	Johnson	SR	H2O-CTL	pupa	live	n
1	Johnson	SR	Pentarra	pupa	live	n
2	Johnson	SR	Pentarra	pupa	live	n
4	Johnson	SR	Pentarra	pupa	live	n
5	Johnson	SR	Pentarra	pupa	live	n
6	Johnson	SR	Pentarra	pupa	live	n
7	Johnson	SR	Pentarra	pupa	live	n
8	Johnson	SR	Pentarra	pupa	live	n
9	Johnson	SR	Pentarra	pupa	live	n
10	Johnson	SR	Pentarra	pupa	live	n
11	Johnson	SR	Pentarra	pupa	live	n
12	Johnson	SR	Pentarra	pupa	live	n
13	Johnson	SR	Pentarra	pupa	live	n
14	Johnson	SR	Pentarra	pupa	live	n
17	Johnson	SR	Pentarra	pupa	live	n
18	Johnson	SR	Pentarra	pupa	live	n
19	Johnson	SR	Pentarra	pupa	live	n
20	Johnson	SR	Pentarra	pupa	live	n
20	Johnson	SR	Silwet	pupa	dead	y
2	Johnson	SR	Silwet	pupa	live	n
3	Johnson	SR	Silwet	pupa	live	n
4	Johnson	SR	Silwet	pupa	live	n
5	Johnson	SR	Silwet	pupa	live	n
8	Johnson	SR	Silwet	pupa	live	n
9	Johnson	SR	Silwet	pupa	live	n
11	Johnson	SR	Silwet	pupa	live	n
12	Johnson	SR	Silwet	pupa	live	n
16	Johnson	SR	Silwet	pupa	live	n
17	Johnson	SR	Silwet	pupa	live	n
18	Johnson	SR	Silwet	pupa	live	n
19	Johnson	SR	Silwet	pupa	live	n
1	Johnson	SR	SunSpray	pupa	live	n
2	Johnson	SR	SunSpray	pupa	live	n
4	Johnson	SR	SunSpray	pupa	live	n
6	Johnson	SR	SunSpray	pupa	live	n
7	Johnson	SR	SunSpray	pupa	live	n
10	Johnson	SR	SunSpray	pupa	live	n
11	Johnson	SR	SunSpray	pupa	live	n
12	Johnson	SR	SunSpray	pupa	live	n
13	Johnson	SR	SunSpray	pupa	live	n
14	Johnson	SR	SunSpray	pupa	live	n
15	Johnson	SR	SunSpray	pupa	live	n
16	Johnson	SR	SunSpray	pupa	live	n
17	Johnson	SR	SunSpray	pupa	live	n
18	Johnson	SR	SunSpray	pupa	live	n
19	Johnson	SR	SunSpray	pupa	live	n
20	Johnson	SR	SunSpray	pupa	live	n
1	Johnson	SR	Syl-Tac	pupa	live	n
2	Johnson	SR	Syl-Tac	pupa	live	n
4	Johnson	SR	Syl-Tac	pupa	live	n
5	Johnson	SR	Syl-Tac	pupa	live	n
6	Johnson	SR	Syl-Tac	pupa	live	n
7	Johnson	SR	Syl-Tac	pupa	live	n
8	Johnson	SR	Syl-Tac	pupa	live	n
9	Johnson	SR	Syl-Tac	pupa	live	n
10	Johnson	SR	Syl-Tac	pupa	live	n
11	Johnson	SR	Syl-Tac	pupa	live	n
12	Johnson	SR	Syl-Tac	pupa	live	n
13	Johnson	SR	Syl-Tac	pupa	live	n
14	Johnson	SR	Syl-Tac	pupa	live	n
15	Johnson	SR	Syl-Tac	pupa	live	n
16	Johnson	SR	Syl-Tac	pupa	live	n
17	Johnson	SR	Syl-Tac	pupa	live	n
18	Johnson	SR	Syl-Tac	pupa	live	n
20	Johnson	SR	Syl-Tac	pupa	live	n
4	Schuler	HB	Barricade	pupa	live	n
6	Schuler	HB	Barricade	pupa	live	n
7	Schuler	HB	Barricade	pupa	live	n
12	Schuler	HB	Barricade	pupa	live	n
13	Schuler	HB	Barricade	pupa	live	n
15	Schuler	HB	Barricade	pupa	live	n
16	Schuler	HB	Barricade	pupa	live	n
17	Schuler	HB	Barricade	pupa	live	n
18	Schuler	HB	Barricade	pupa	live	n
19	Schuler	HB	Barricade	pupa	live	n
20	Schuler	HB	Barricade	pupa	live	n
21	Schuler	HB	Barricade	pupa	live	n
1	Schuler	HB	H2O-CTL	pupa	live	n
2	Schuler	HB	H2O-CTL	pupa	live	n
3	Schuler	HB	H2O-CTL	pupa	live	n
4	Schuler	HB	H2O-CTL	pupa	live	n
5	Schuler	HB	H2O-CTL	pupa	live	n
6	Schuler	HB	H2O-CTL	pupa	live	n
7	Schuler	HB	H2O-CTL	pupa	live	n
8	Schuler	HB	H2O-CTL	pupa	live	n
9	Schuler	HB	H2O-CTL	pupa	live	n
10	Schuler	HB	H2O-CTL	pupa	live	n
11	Schuler	HB	H2O-CTL	pupa	live	n
12	Schuler	HB	H2O-CTL	pupa	live	n
13	Schuler	HB	H2O-CTL	pupa	live	n
16	Schuler	HB	H2O-CTL	pupa	live	n
18	Schuler	HB	H2O-CTL	pupa	live	n
19	Schuler	HB	H2O-CTL	pupa	live	n
20	Schuler	HB	H2O-CTL	pupa	live	n
1	Schuler	HB	Pentarra	pupa	live	n
2	Schuler	HB	Pentarra	pupa	live	n
3	Schuler	HB	Pentarra	pupa	live	n
6	Schuler	HB	Pentarra	pupa	live	n
9	Schuler	HB	Pentarra	pupa	live	n
10	Schuler	HB	Pentarra	pupa	live	n
11	Schuler	HB	Pentarra	pupa	live	n
14	Schuler	HB	Pentarra	pupa	live	n
15	Schuler	HB	Pentarra	pupa	live	n
16	Schuler	HB	Pentarra	pupa	live	n
18	Schuler	HB	Pentarra	pupa	live	n
20	Schuler	HB	Pentarra	pupa	live	n
2	Schuler	HB	Silwet	pupa	live	n
4	Schuler	HB	Silwet	pupa	live	n
6	Schuler	HB	Silwet	pupa	live	n
7	Schuler	HB	Silwet	pupa	live	n
10	Schuler	HB	Silwet	pupa	live	n
11	Schuler	HB	Silwet	pupa	live	n
12	Schuler	HB	Silwet	pupa	live	n
13	Schuler	HB	Silwet	pupa	live	n
14	Schuler	HB	Silwet	pupa	live	n
15	Schuler	HB	Silwet	pupa	live	n
16	Schuler	HB	Silwet	pupa	live	n
18	Schuler	HB	Silwet	pupa	live	n
20	Schuler	HB	Silwet	pupa	live	n
4	Schuler	HB	SunSpray	pupa	live	n
5	Schuler	HB	SunSpray	pupa	live	n
6	Schuler	HB	SunSpray	pupa	live	n
7	Schuler	HB	SunSpray	pupa	live	n
8	Schuler	HB	SunSpray	pupa	live	n
10	Schuler	HB	SunSpray	pupa	live	n
11	Schuler	HB	SunSpray	pupa	live	n
13	Schuler	HB	SunSpray	pupa	live	n
14	Schuler	HB	SunSpray	pupa	live	n
15	Schuler	HB	SunSpray	pupa	live	n
16	Schuler	HB	SunSpray	pupa	live	n
19	Schuler	HB	SunSpray	pupa	live	n
20	Schuler	HB	SunSpray	pupa	live	n
1	Schuler	HB	Syl-Tac	pupa	live	n
2	Schuler	HB	Syl-Tac	pupa	live	n
3	Schuler	HB	Syl-Tac	pupa	live	n
4	Schuler	HB	Syl-Tac	pupa	live	n
5	Schuler	HB	Syl-Tac	pupa	live	n
6	Schuler	HB	Syl-Tac	pupa	live	n
7	Schuler	HB	Syl-Tac	pupa	live	n
8	Schuler	HB	Syl-Tac	pupa	live	n
9	Schuler	HB	Syl-Tac	pupa	live	n
10	Schuler	HB	Syl-Tac	pupa	live	n
11	Schuler	HB	Syl-Tac	pupa	live	n
12	Schuler	HB	Syl-Tac	pupa	live	n
13	Schuler	HB	Syl-Tac	pupa	live	n
14	Schuler	HB	Syl-Tac	pupa	live	n
15	Schuler	HB	Syl-Tac	pupa	live	n
16	Schuler	HB	Syl-Tac	pupa	live	n
17	Schuler	HB	Syl-Tac	pupa	live	n
18	Schuler	HB	Syl-Tac	pupa	live	n
20	Schuler	HB	Syl-Tac	pupa	live	n
1	Schuler	SF	Barricade	pupa	live	n
2	Schuler	SF	Barricade	pupa	live	n
4	Schuler	SF	Barricade	pupa	live	n
6	Schuler	SF	Barricade	pupa	live	n
10	Schuler	SF	Barricade	pupa	live	n
11	Schuler	SF	Barricade	pupa	live	n
13	Schuler	SF	Barricade	pupa	live	n
15	Schuler	SF	Barricade	pupa	live	n
16	Schuler	SF	Barricade	pupa	live	n
20	Schuler	SF	Barricade	pupa	live	n
2	Schuler	SF	H2O-CTL	pupa	live	n
4	Schuler	SF	H2O-CTL	pupa	live	n
6	Schuler	SF	H2O-CTL	pupa	live	n
7	Schuler	SF	H2O-CTL	pupa	live	n
8	Schuler	SF	H2O-CTL	pupa	live	n
10	Schuler	SF	H2O-CTL	pupa	live	n
12	Schuler	SF	H2O-CTL	pupa	live	n
14	Schuler	SF	H2O-CTL	pupa	live	n
16	Schuler	SF	H2O-CTL	pupa	live	n
17	Schuler	SF	H2O-CTL	pupa	live	n
18	Schuler	SF	H2O-CTL	pupa	live	n
20	Schuler	SF	H2O-CTL	pupa	live	n
3	Schuler	SF	Pentarra	pupa	live	n
5	Schuler	SF	Pentarra	pupa	live	n
6	Schuler	SF	Pentarra	pupa	live	n
10	Schuler	SF	Pentarra	pupa	live	n
13	Schuler	SF	Pentarra	pupa	live	n
14	Schuler	SF	Pentarra	pupa	live	n
16	Schuler	SF	Pentarra	pupa	live	n
17	Schuler	SF	Pentarra	pupa	live	n
18	Schuler	SF	Pentarra	pupa	live	n
19	Schuler	SF	Pentarra	pupa	live	n
8	Schuler	SF	Pentarra	pupa	live	n
4	Schuler	SF	Silwet	pupa	live	n
5	Schuler	SF	Silwet	pupa	live	n
7	Schuler	SF	Silwet	pupa	live	n
11	Schuler	SF	Silwet	pupa	live	n
13	Schuler	SF	Silwet	pupa	live	n
14	Schuler	SF	Silwet	pupa	live	n
19	Schuler	SF	Silwet	pupa	live	n
2	Schuler	SF	SunSpray	pupa	live	n
3	Schuler	SF	SunSpray	pupa	live	n
6	Schuler	SF	SunSpray	pupa	live	n
7	Schuler	SF	SunSpray	pupa	live	n
8	Schuler	SF	SunSpray	pupa	live	n
9	Schuler	SF	SunSpray	pupa	live	n
11	Schuler	SF	SunSpray	pupa	live	n
12	Schuler	SF	SunSpray	pupa	live	n
14	Schuler	SF	SunSpray	pupa	live	n
16	Schuler	SF	SunSpray	pupa	live	n
18	Schuler	SF	SunSpray	pupa	live	n
19	Schuler	SF	SunSpray	pupa	live	n
20	Schuler	SF	SunSpray	pupa	live	n
2	Schuler	SF	Syl-Tac	pupa	live	n
3	Schuler	SF	Syl-Tac	pupa	live	n
6	Schuler	SF	Syl-Tac	pupa	live	n
8	Schuler	SF	Syl-Tac	pupa	live	n
10	Schuler	SF	Syl-Tac	pupa	live	n
12	Schuler	SF	Syl-Tac	pupa	live	n
13	Schuler	SF	Syl-Tac	pupa	live	n
14	Schuler	SF	Syl-Tac	pupa	live	n
15	Schuler	SF	Syl-Tac	pupa	live	n
16	Schuler	SF	Syl-Tac	pupa	live	n
17	Schuler	SF	Syl-Tac	pupa	live	n
18	Schuler	SF	Syl-Tac	pupa	live	n
19	Schuler	SF	Syl-Tac	pupa	live	n
20	Schuler	SF	Syl-Tac	pupa	live	n
1	Schuler	SR	Barricade	pupa	live	n
2	Schuler	SR	Barricade	pupa	live	n
3	Schuler	SR	Barricade	pupa	live	n
4	Schuler	SR	Barricade	pupa	live	n
5	Schuler	SR	Barricade	pupa	live	n
6	Schuler	SR	Barricade	pupa	live	n
7	Schuler	SR	Barricade	pupa	live	n
8	Schuler	SR	Barricade	pupa	live	n
9	Schuler	SR	Barricade	pupa	live	n
10	Schuler	SR	Barricade	pupa	live	n
11	Schuler	SR	Barricade	pupa	live	n
12	Schuler	SR	Barricade	pupa	live	n
13	Schuler	SR	Barricade	pupa	live	n
14	Schuler	SR	Barricade	pupa	live	n
15	Schuler	SR	Barricade	pupa	live	n
16	Schuler	SR	Barricade	pupa	live	n
17	Schuler	SR	Barricade	pupa	live	n
18	Schuler	SR	Barricade	pupa	live	n
19	Schuler	SR	Barricade	pupa	live	n
20	Schuler	SR	Barricade	pupa	live	n
2	Schuler	SR	H2O-CTL	pupa	live	n
3	Schuler	SR	H2O-CTL	pupa	live	n
4	Schuler	SR	H2O-CTL	pupa	live	n
6	Schuler	SR	H2O-CTL	pupa	live	n
8	Schuler	SR	H2O-CTL	pupa	live	n
11	Schuler	SR	H2O-CTL	pupa	live	n
14	Schuler	SR	H2O-CTL	pupa	live	n
15	Schuler	SR	H2O-CTL	pupa	live	n
16	Schuler	SR	H2O-CTL	pupa	live	n
17	Schuler	SR	H2O-CTL	pupa	live	n
20	Schuler	SR	H2O-CTL	pupa	live	n
1	Schuler	SR	Pentarra	pupa	live	n
2	Schuler	SR	Pentarra	pupa	live	n
3	Schuler	SR	Pentarra	pupa	live	n
4	Schuler	SR	Pentarra	pupa	live	n
5	Schuler	SR	Pentarra	pupa	live	n
7	Schuler	SR	Pentarra	pupa	live	n
8	Schuler	SR	Pentarra	pupa	live	n
10	Schuler	SR	Pentarra	pupa	live	n
15	Schuler	SR	Pentarra	pupa	live	n
16	Schuler	SR	Pentarra	pupa	live	n
19	Schuler	SR	Pentarra	pupa	live	n
1	Schuler	SR	Silwet	pupa	live	n
2	Schuler	SR	Silwet	pupa	live	n
4	Schuler	SR	Silwet	pupa	live	n
5	Schuler	SR	Silwet	pupa	live	n
7	Schuler	SR	Silwet	pupa	live	n
8	Schuler	SR	Silwet	pupa	live	n
9	Schuler	SR	Silwet	pupa	live	n
12	Schuler	SR	Silwet	pupa	live	n
16	Schuler	SR	Silwet	pupa	live	n
17	Schuler	SR	Silwet	pupa	live	n
19	Schuler	SR	Silwet	pupa	live	n
20	Schuler	SR	Silwet	pupa	live	n
3	Schuler	SR	SunSpray	pupa	live	n
4	Schuler	SR	SunSpray	pupa	live	n
7	Schuler	SR	SunSpray	pupa	live	n
11	Schuler	SR	SunSpray	pupa	live	n
14	Schuler	SR	SunSpray	pupa	live	n
15	Schuler	SR	SunSpray	pupa	live	n
17	Schuler	SR	SunSpray	pupa	live	n
18	Schuler	SR	SunSpray	pupa	live	n
1	Schuler	SR	Syl-Tac	pupa	live	n
2	Schuler	SR	Syl-Tac	pupa	live	n
3	Schuler	SR	Syl-Tac	pupa	live	n
5	Schuler	SR	Syl-Tac	pupa	live	n
6	Schuler	SR	Syl-Tac	pupa	live	n
8	Schuler	SR	Syl-Tac	pupa	live	n
10	Schuler	SR	Syl-Tac	pupa	live	n
12	Schuler	SR	Syl-Tac	pupa	live	n
14	Schuler	SR	Syl-Tac	pupa	live	n
15	Schuler	SR	Syl-Tac	pupa	live	n
16	Schuler	SR	Syl-Tac	pupa	live	n
19	Schuler	SR	Syl-Tac	pupa	live	n
1	Bjelland	None	Neg CTL	pupa	live	n
3	Bjelland	None	Neg CTL	pupa	live	n
5	Bjelland	None	Neg CTL	pupa	live	n
6	Bjelland	None	Neg CTL	pupa	live	n
8	Bjelland	None	Neg CTL	pupa	live	n
10	Bjelland	None	Neg CTL	pupa	live	n
11	Bjelland	None	Neg CTL	pupa	live	n
12	Bjelland	None	Neg CTL	pupa	live	n
13	Bjelland	None	Neg CTL	pupa	live	n
14	Bjelland	None	Neg CTL	pupa	live	n
15	Bjelland	None	Neg CTL	pupa	live	n
18	Bjelland	None	Neg CTL	pupa	live	n
20	Bjelland	None	Neg CTL	pupa	live	n
21	Bjelland	None	Neg CTL	pupa	live	n
22	Bjelland	None	Neg CTL	pupa	live	n
23	Bjelland	None	Neg CTL	pupa	live	n
24	Bjelland	None	Neg CTL	pupa	live	n
25	Bjelland	None	Neg CTL	pupa	live	n
26	Bjelland	None	Neg CTL	pupa	live	n
27	Bjelland	None	Neg CTL	pupa	live	n
29	Bjelland	None	Neg CTL	pupa	live	n
2	Johnson	None	Neg CTL	pupa	live	n
3	Johnson	None	Neg CTL	pupa	live	n
4	Johnson	None	Neg CTL	pupa	live	n
7	Johnson	None	Neg CTL	pupa	live	n
8	Johnson	None	Neg CTL	pupa	live	n
9	Johnson	None	Neg CTL	pupa	live	n
11	Johnson	None	Neg CTL	pupa	live	n
14	Johnson	None	Neg CTL	pupa	live	n
16	Johnson	None	Neg CTL	pupa	live	n
18	Johnson	None	Neg CTL	pupa	live	n
19	Johnson	None	Neg CTL	pupa	live	n
20	Johnson	None	Neg CTL	pupa	live	n
22	Johnson	None	Neg CTL	pupa	live	n
23	Johnson	None	Neg CTL	pupa	live	n
24	Johnson	None	Neg CTL	pupa	live	n
26	Johnson	None	Neg CTL	pupa	live	n
27	Johnson	None	Neg CTL	pupa	live	n
30	Johnson	None	Neg CTL	pupa	live	n
2	Schuler	None	Neg CTL	pupa	live	n
3	Schuler	None	Neg CTL	pupa	live	n
5	Schuler	None	Neg CTL	pupa	live	n
6	Schuler	None	Neg CTL	pupa	live	n
8	Schuler	None	Neg CTL	pupa	live	n
9	Schuler	None	Neg CTL	pupa	live	n
10	Schuler	None	Neg CTL	pupa	live	n
14	Schuler	None	Neg CTL	pupa	live	n
15	Schuler	None	Neg CTL	pupa	live	n
16	Schuler	None	Neg CTL	pupa	live	n
18	Schuler	None	Neg CTL	pupa	live	n
19	Schuler	None	Neg CTL	pupa	live	n
20	Schuler	None	Neg CTL	pupa	live	n
21	Schuler	None	Neg CTL	pupa	live	n
22	Schuler	None	Neg CTL	pupa	live	n
23	Schuler	None	Neg CTL	pupa	live	n
24	Schuler	None	Neg CTL	pupa	live	n
21	Bjelland	HB	Barricade	uk	dead	y
2	Bjelland	HB	Silwet	uk	dead	y
11	Bjelland	SF	Barricade	uk	dead	y
21	Bjelland	SF	SunSpray	uk	dead	y
9	Johnson	HB	Pentarra	uk	dead	y
11	Johnson	HB	SunSpray	uk	dead	y
12	Johnson	SF	Barricade	uk	dead	y
6	Johnson	SF	SunSpray	uk	dead	y
6	Johnson	SR	Silwet	uk	dead	y
7	Johnson	SR	Silwet	uk	dead	y
2	Schuler	HB	Barricade	uk	dead	y
21	Schuler	HB	SunSpray	uk	dead	y
9	Schuler	SF	Pentarra	uk	dead	y
15	Schuler	SF	Pentarra	uk	dead	y
4	Schuler	SF	Pentarra	uk	dead	n
3	Schuler	SF	Silwet	uk	dead	y
12	Schuler	SF	Silwet	uk	dead	y
9	Schuler	SF	Silwet	uk	dead	y
5	Schuler	SF	SunSpray	uk	dead	y
17	Schuler	SF	SunSpray	uk	dead	n
